# Supplementary material for: Gold(iii) complexes of 5-methyl-5-(pyridyl)-2,4-imidazolidenedione: synthesis, physicochemical, theoretical, antibacterial, and cytotoxicity investigation
Source: Royal Society of Chemistry journal article supplement (doi:10.1039/c3nj01042b), 2013-11-30
Supplement: c3nj01042b.pdf [file c3nj01042b.pdf]

## Electronic Supplementary Information (ESI)

**Journal name:** New journal of chemistry

### **Gold(III) complexes of 5-methyl-5-(pyridyl)-2,4-imidazolidenedione: Synthesis, physicochemical, theoretical, antibacterial, and cytotoxicity investigation**

Seyyed Javad Sabounchei<sup>a,\*</sup>, Parisa Shahriary<sup>a</sup>, Sadegh Salehzadeh<sup>a</sup>, Yasin Gholiee<sup>a</sup>, Davood Nematollahi<sup>a</sup>, Abdolkarim Chehregani<sup>b</sup>, Amene Amani<sup>a</sup>

<sup>a</sup>*Faculty of Chemistry, Bu–Ali Sina University, Hamedan 65174, Iran*

<sup>b</sup>*Faculty of Science, Department of Biology, Bu–Ali Sina University, Hamedan 65174, Iran*

Email: [jsabounchei@yahoo.co.uk](mailto:jsabounchei@yahoo.co.uk)

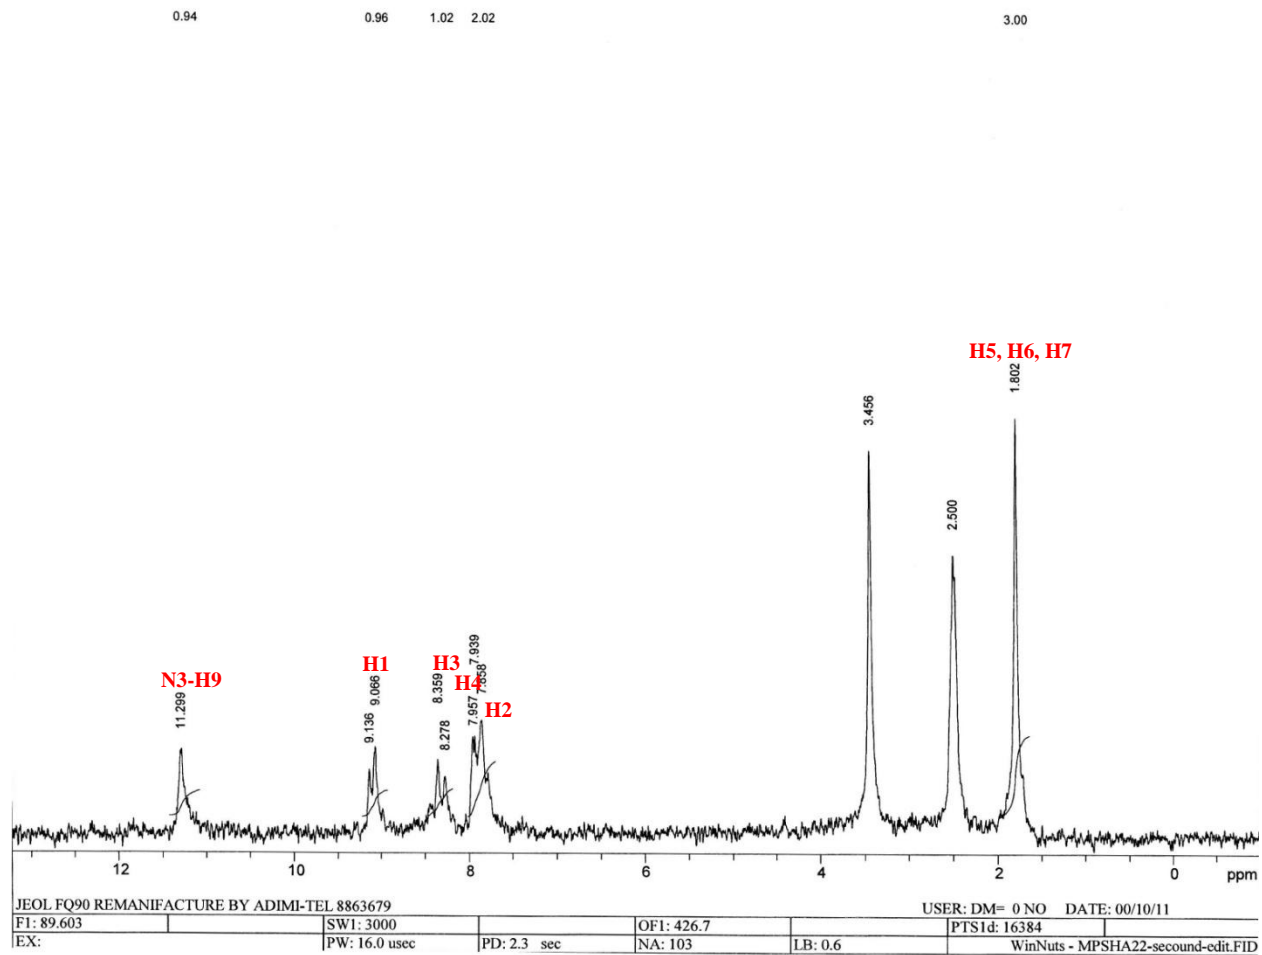

**Figure A.1.**  $^1\text{H}$ NMR spectrum of **1** with peak assignment according to **Figure 2**

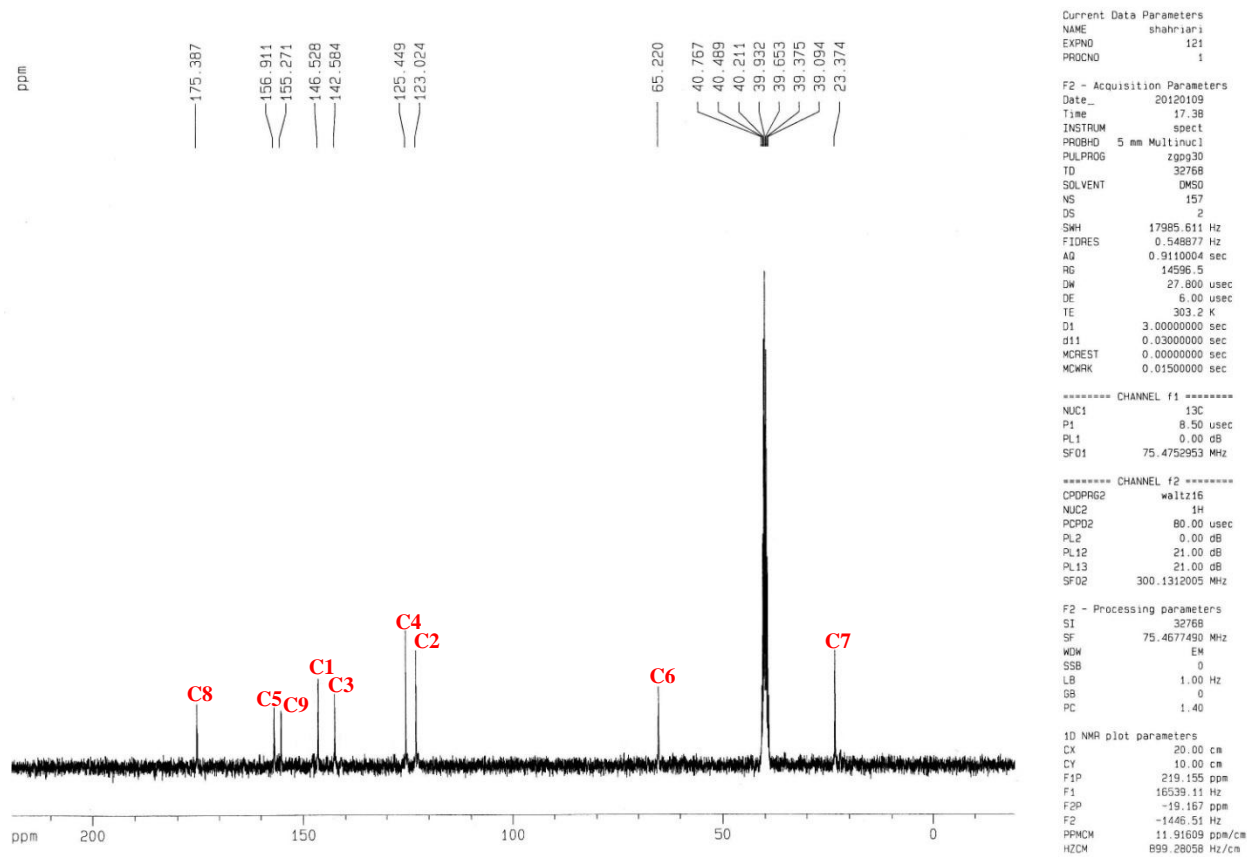

**Figure A.2.**  $^{13}\text{C}$ NMR spectrum of **1** with peak assignment according to **Figure 2**

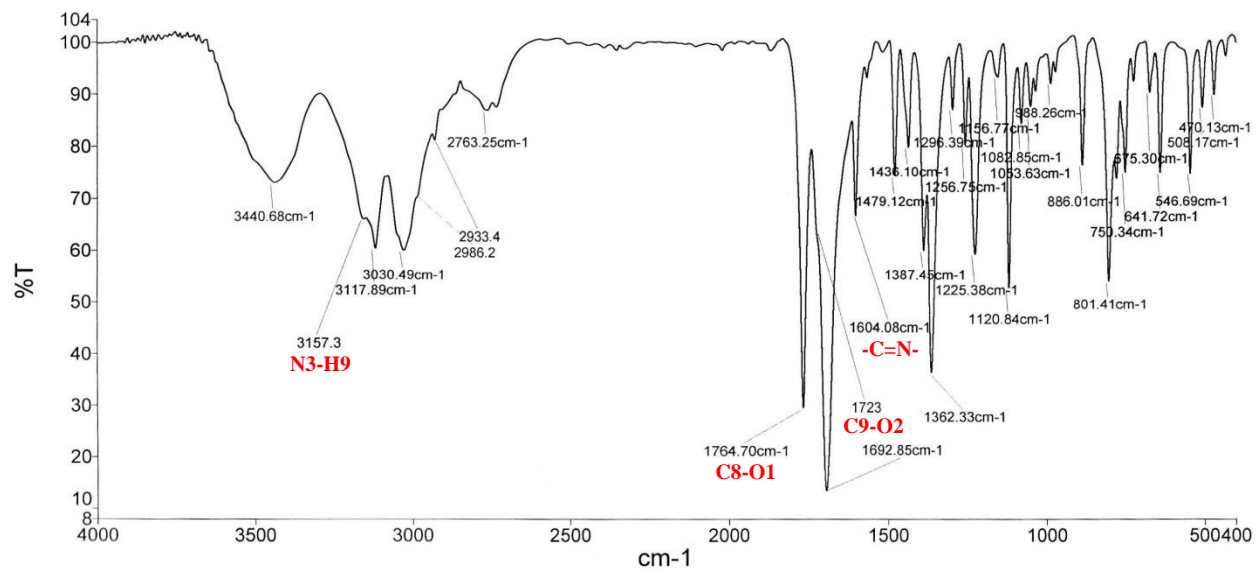

Figure A.3. IR spectrum of 1 with peak assignment according to Figure 2

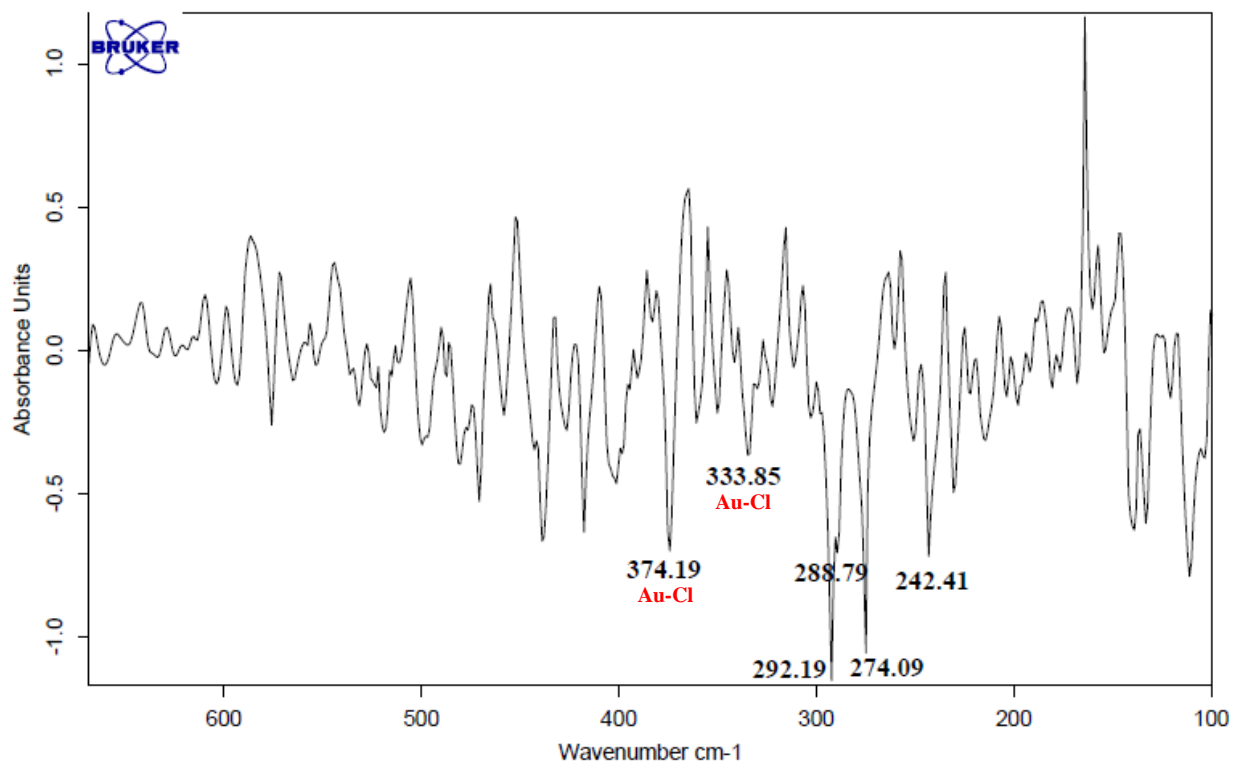

**Figure A.4.** ATR-IR spectrum of **1**

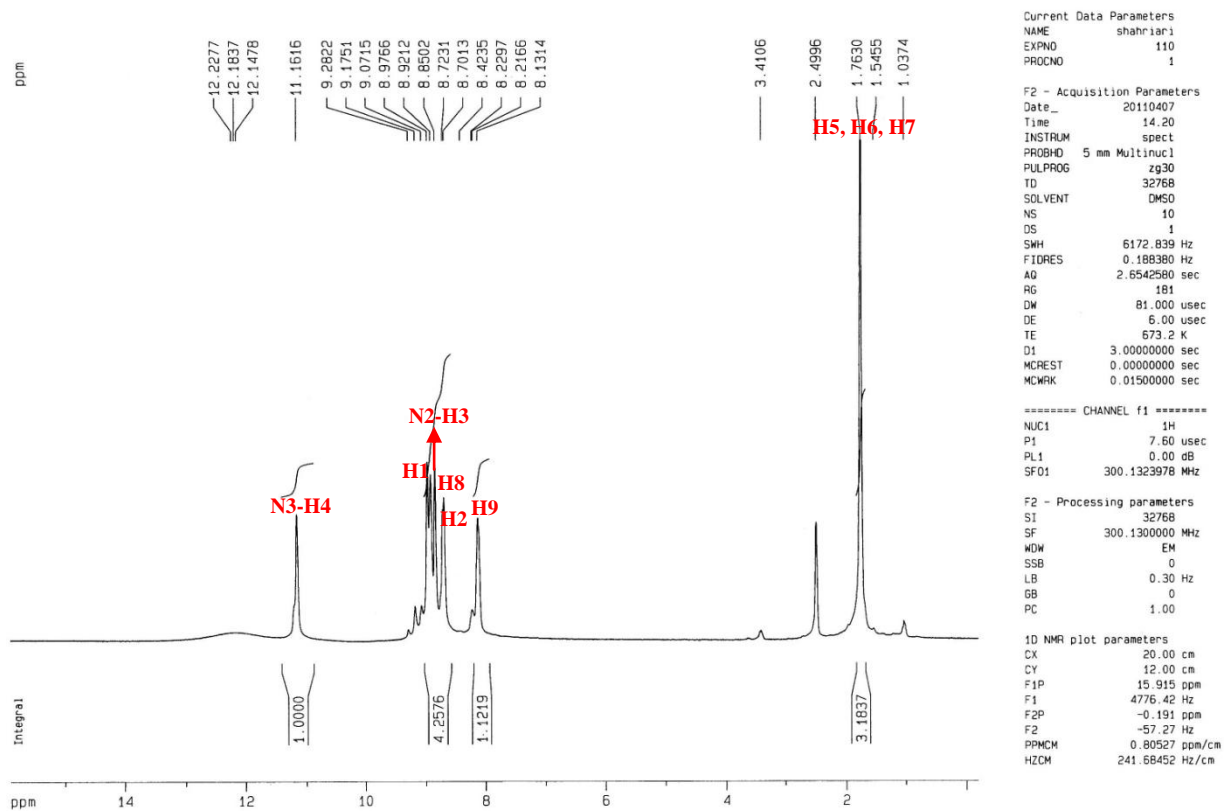

Figure A.5. <sup>1</sup>H NMR spectrum of 2 with peak assignment according to Figure 4

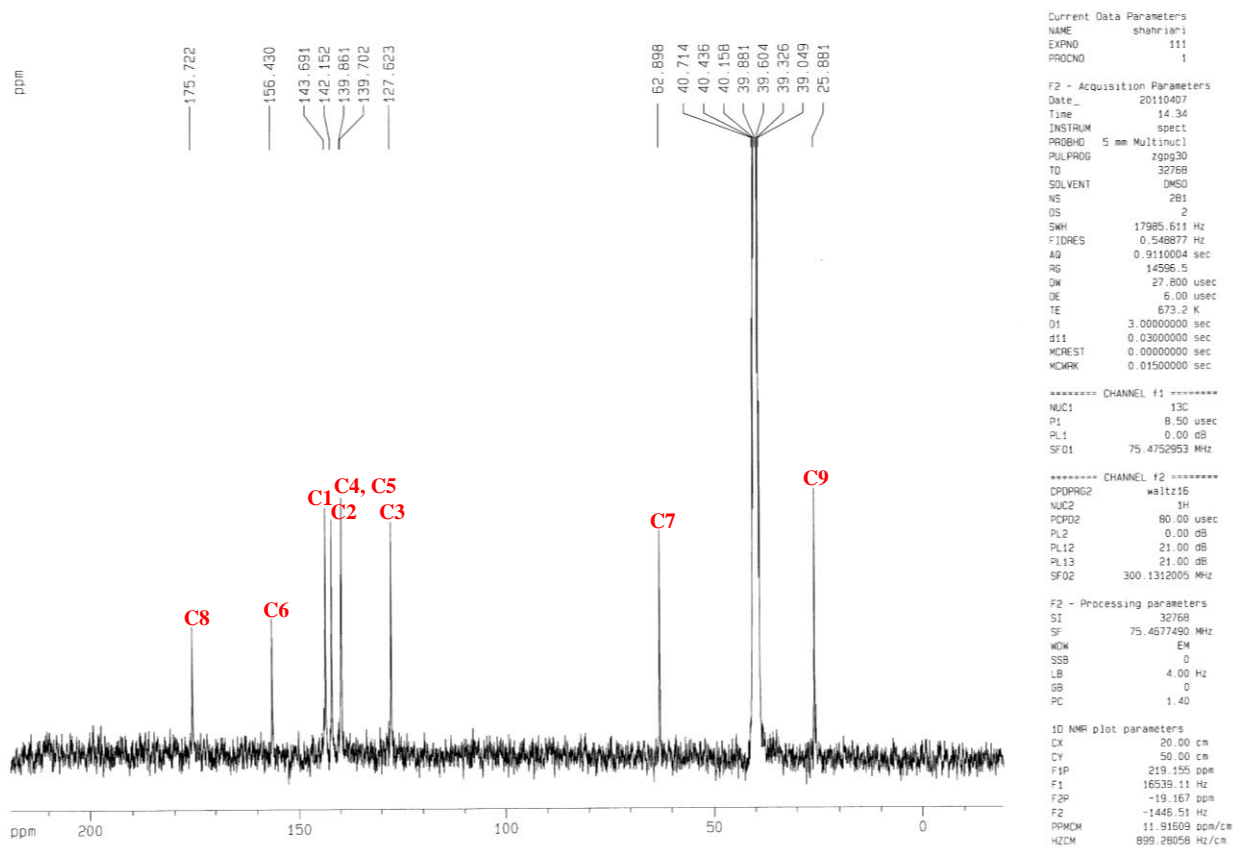

Figure A.6.  $^{13}\text{C}$ NMR spectrum of 2 with peak assignment according to Figure 4

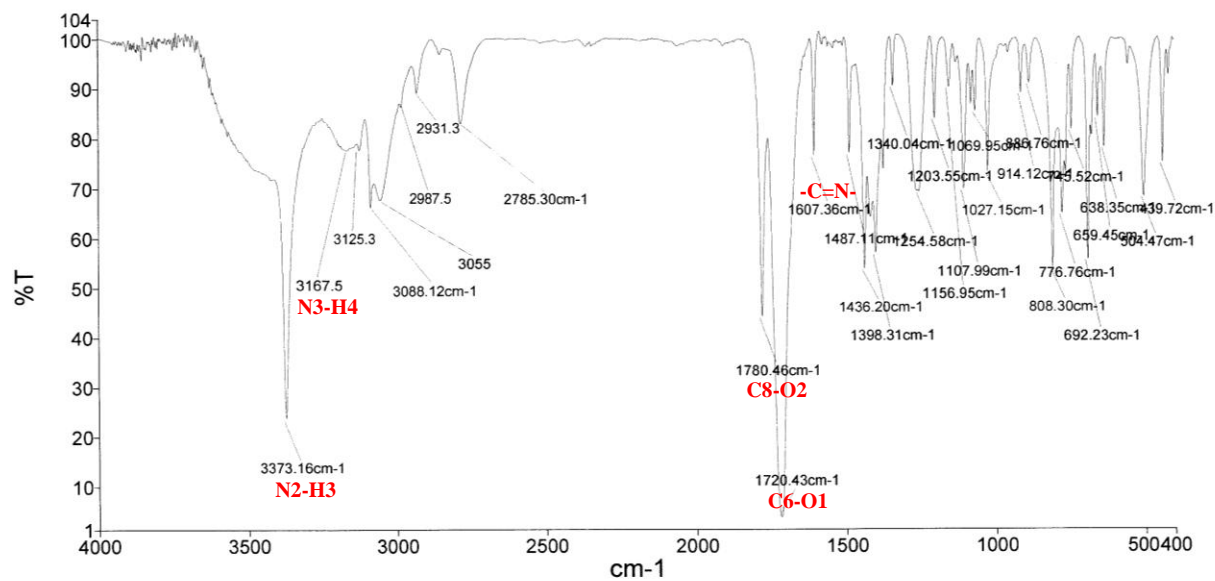

Figure A.7. IR spectrum of **2** with peak assignment according to **Figure 4**



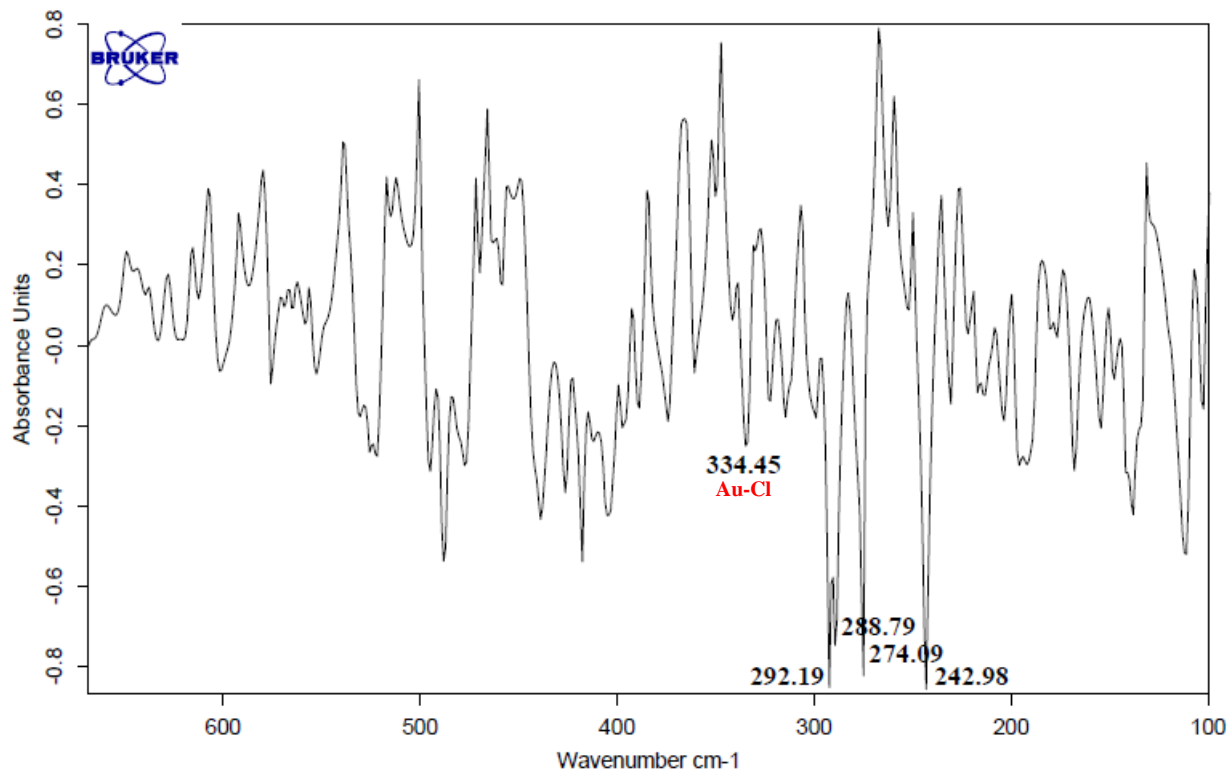

**Figure A.8.** ATR-IR spectrum of **2**

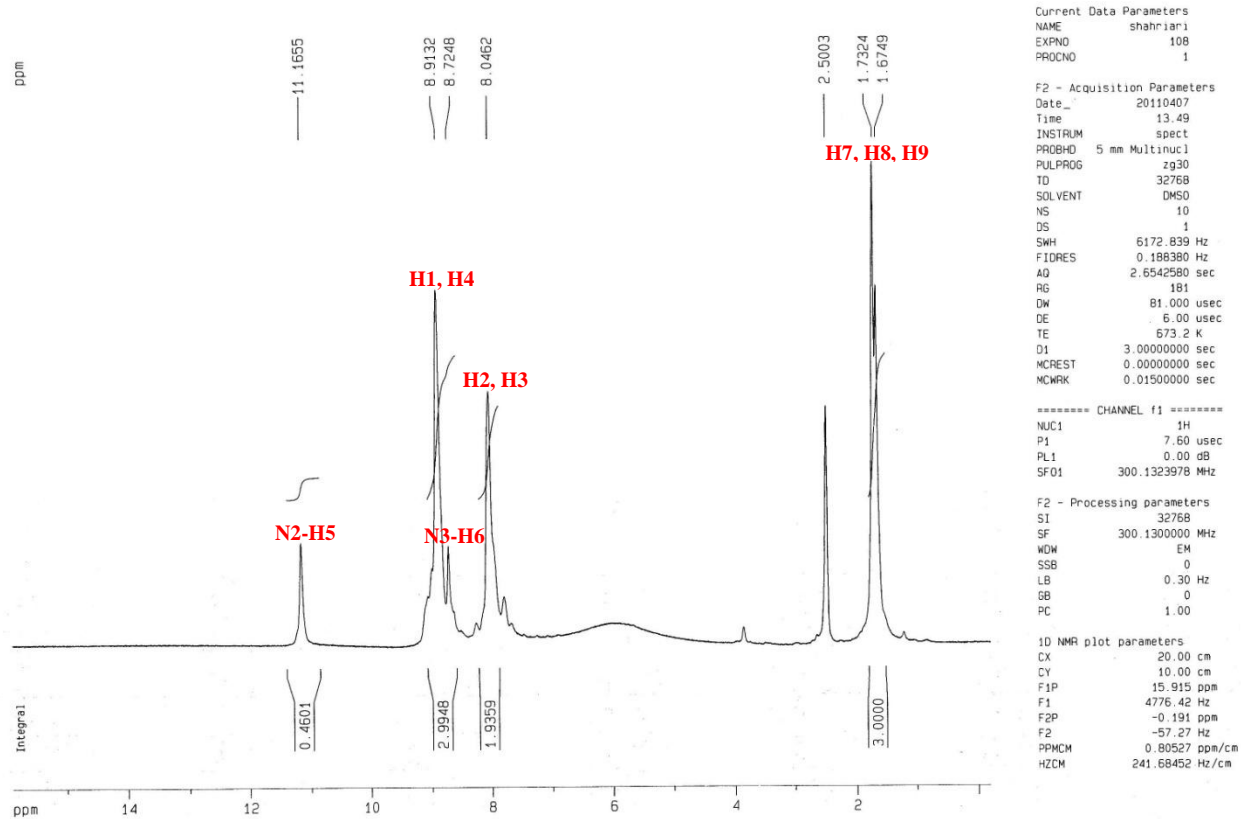

Figure A.9. <sup>1</sup>H NMR spectrum of 3 with peak assignment according to Figure 4

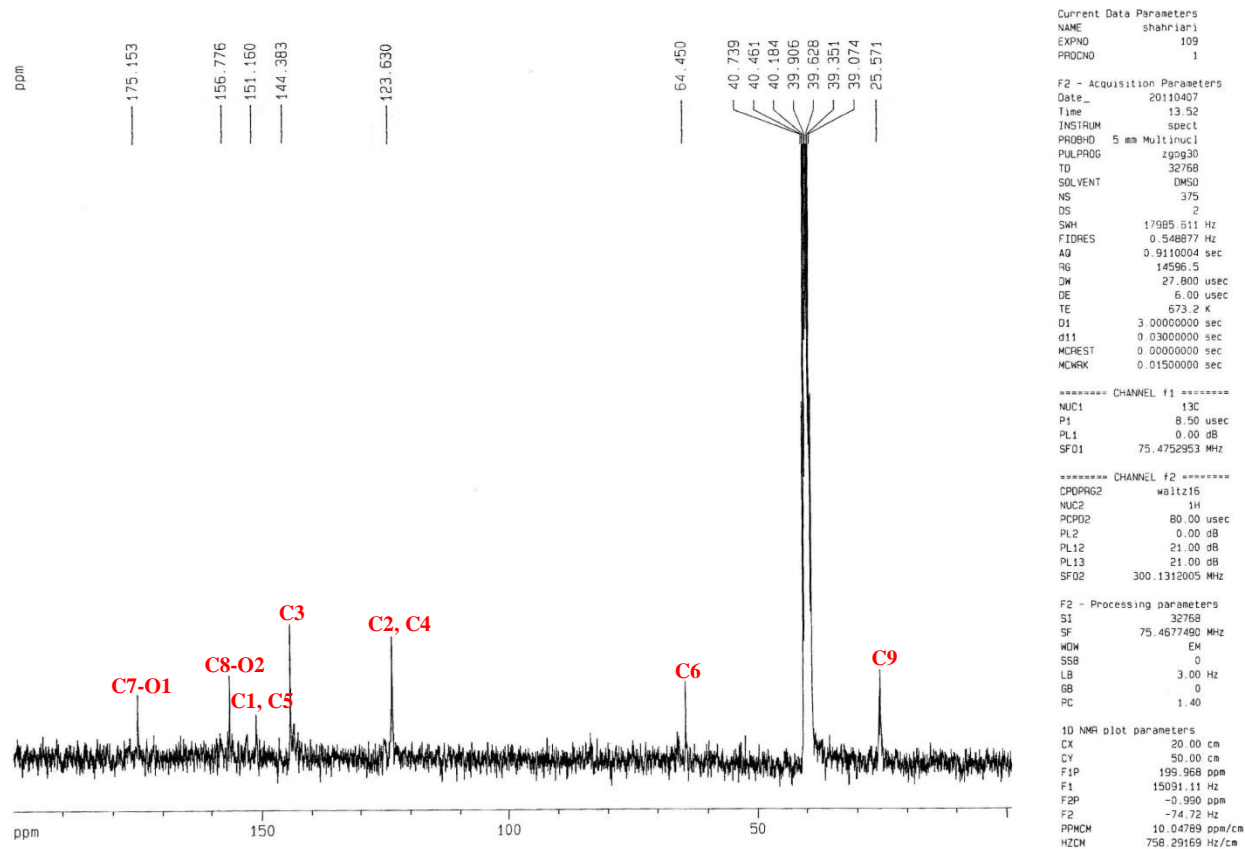

Fig. A.10.  $^{13}\text{C}$ NMR spectrum of 3 with peak assignment according to Figure 4

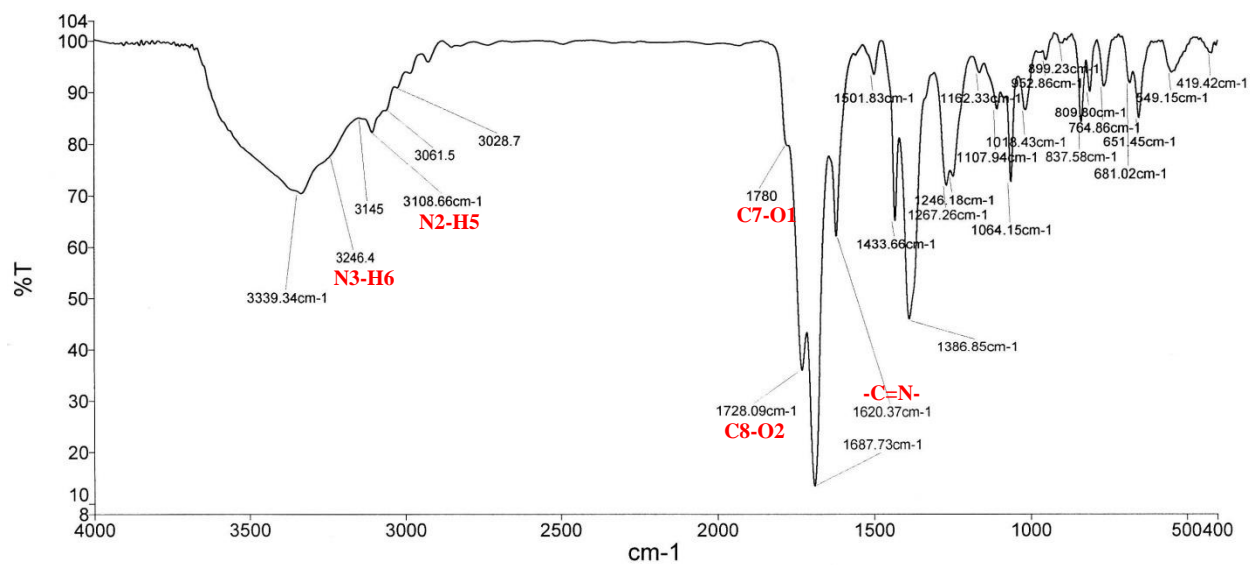

Figure A.11. IR spectrum of 3 with peak assignment according to Figure 4

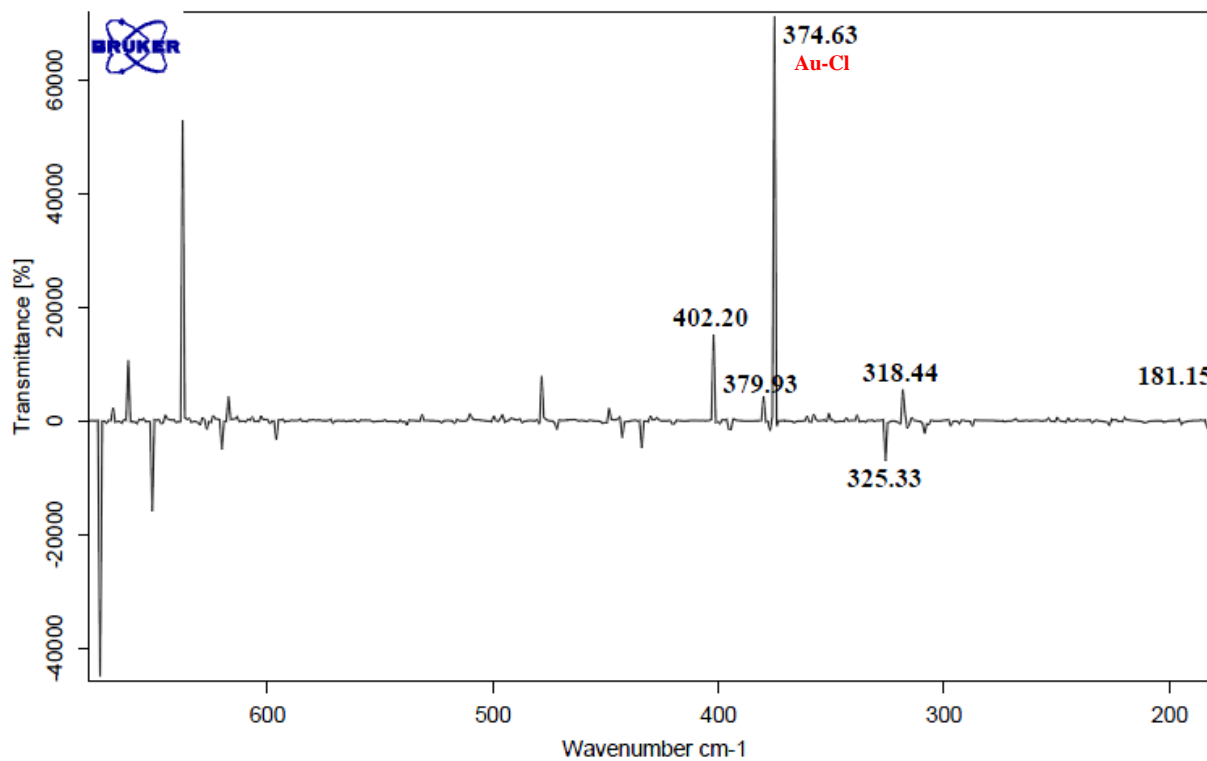

**Figure A.12.** ATR-IR spectrum of **3**

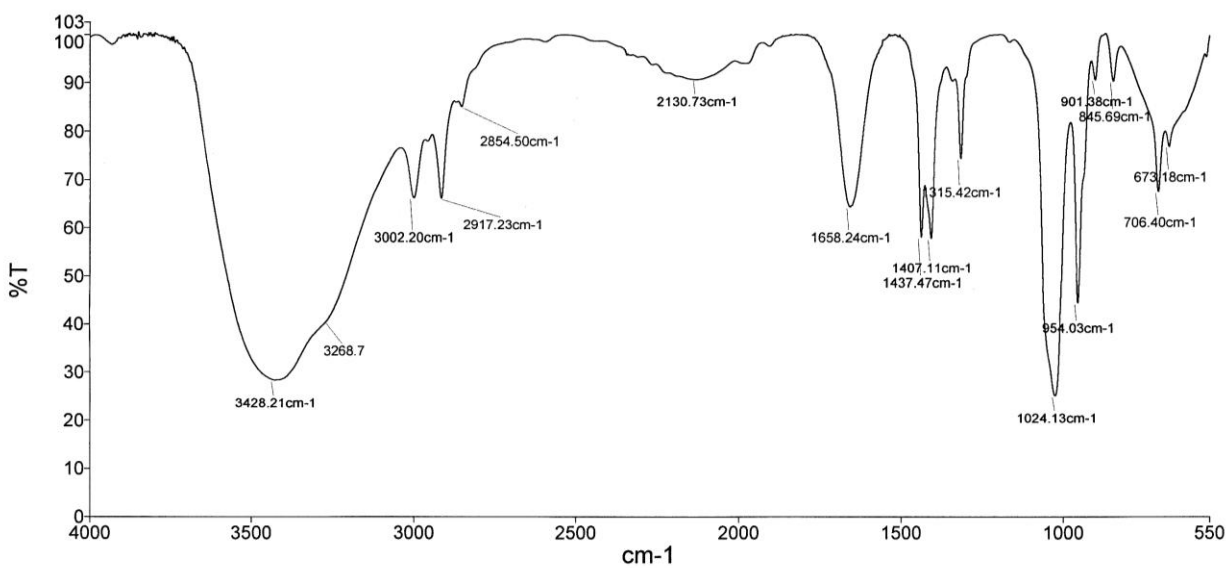

Figure A.13. IR spectrum of DMSO solvent

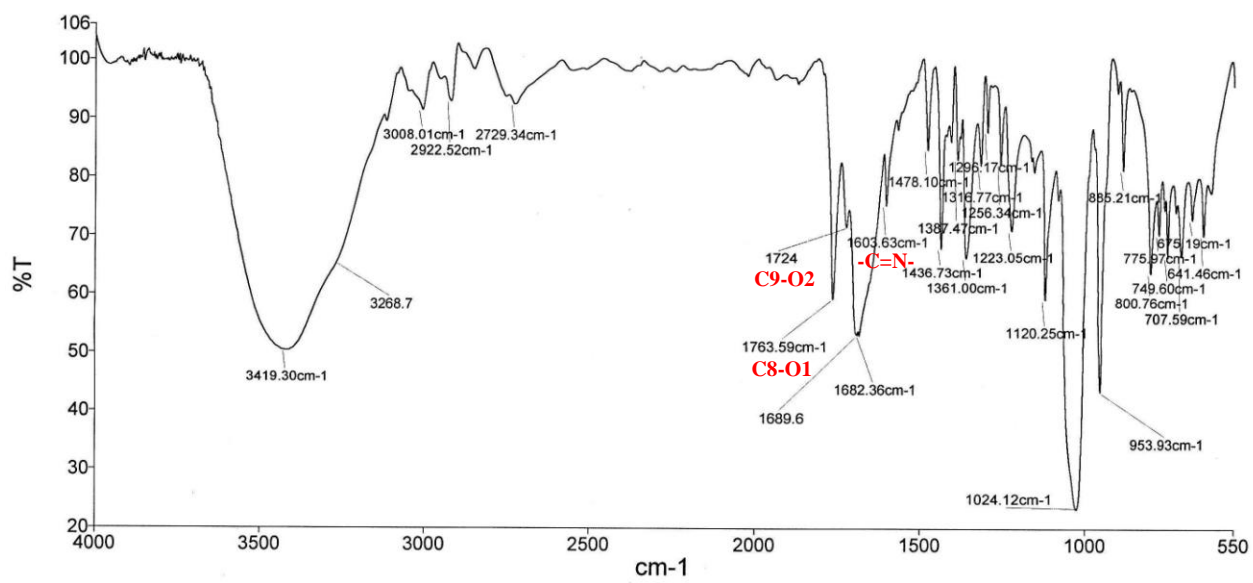

Figure A.14. IR spectrum of DMSO solution of **1**

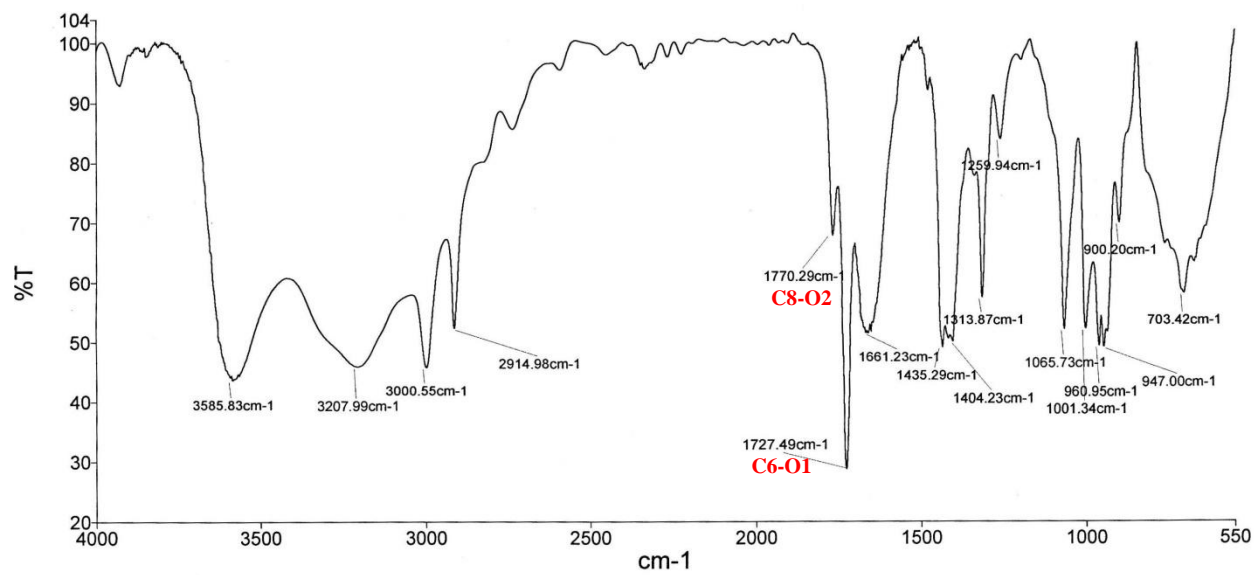

Figure A. 15. IR spectrum of DMSO solution of 2



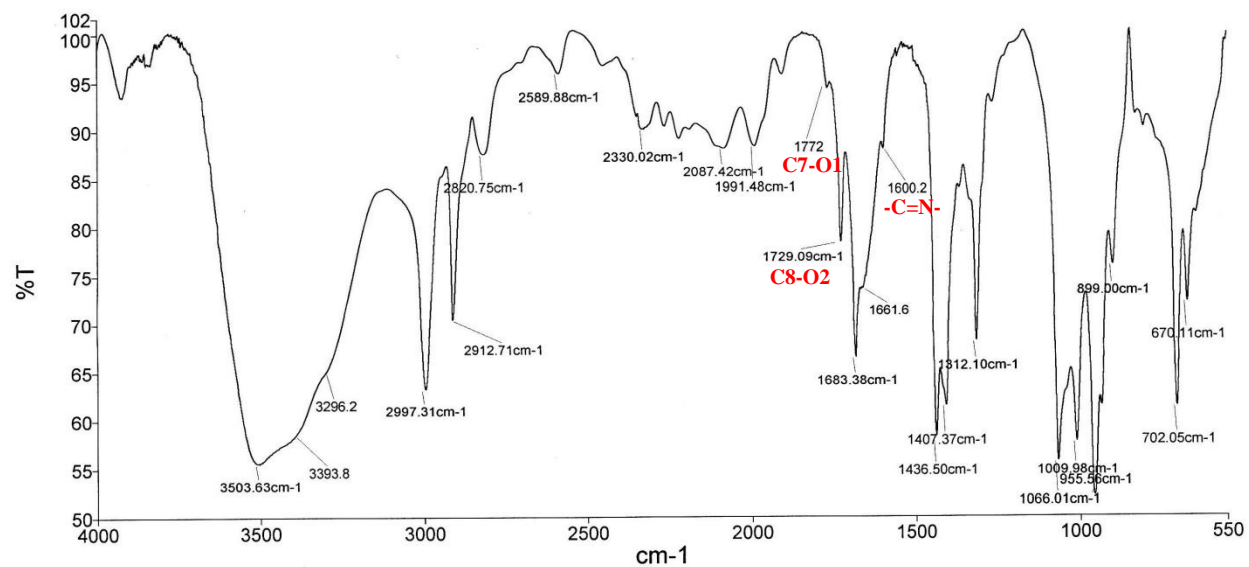

Figure A.16. IR spectrum of DMSO solution of 3

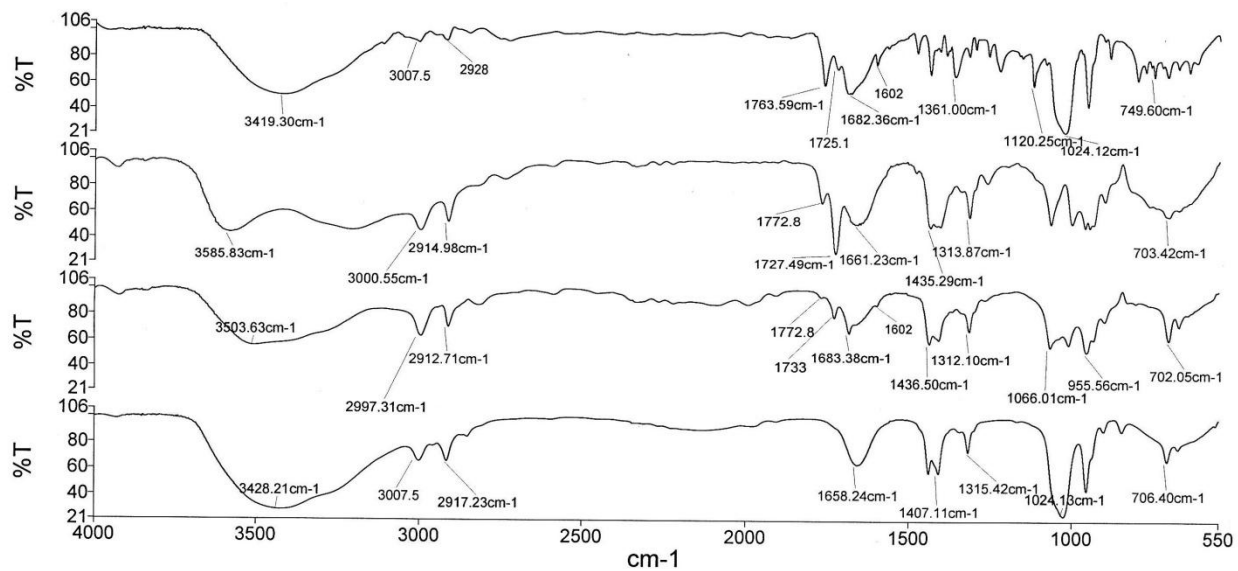

Figure A.17. IR spectrum of DMSO solution of **1**, **2**, **3**, and **DMSO** (up to down) for comparison

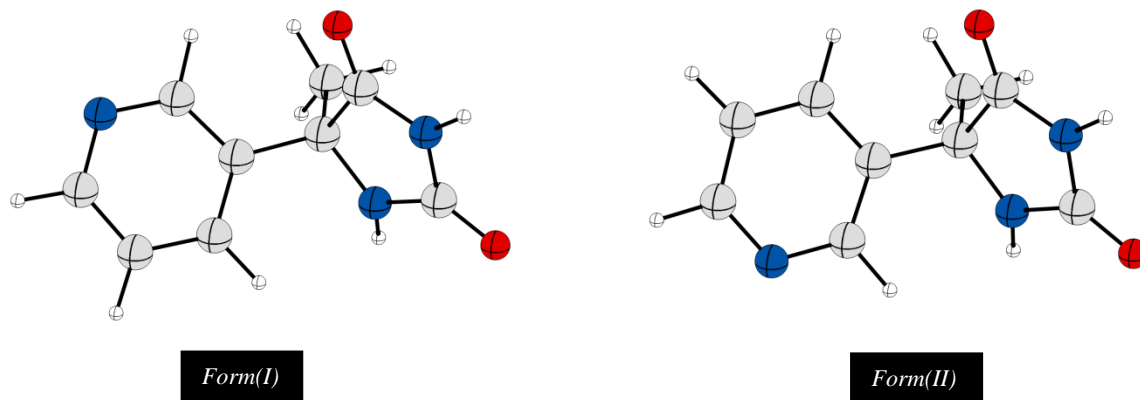

**Figure A.18.** Optimized structures of two possible conformers for **L2** at BP86/TZVP level of theory

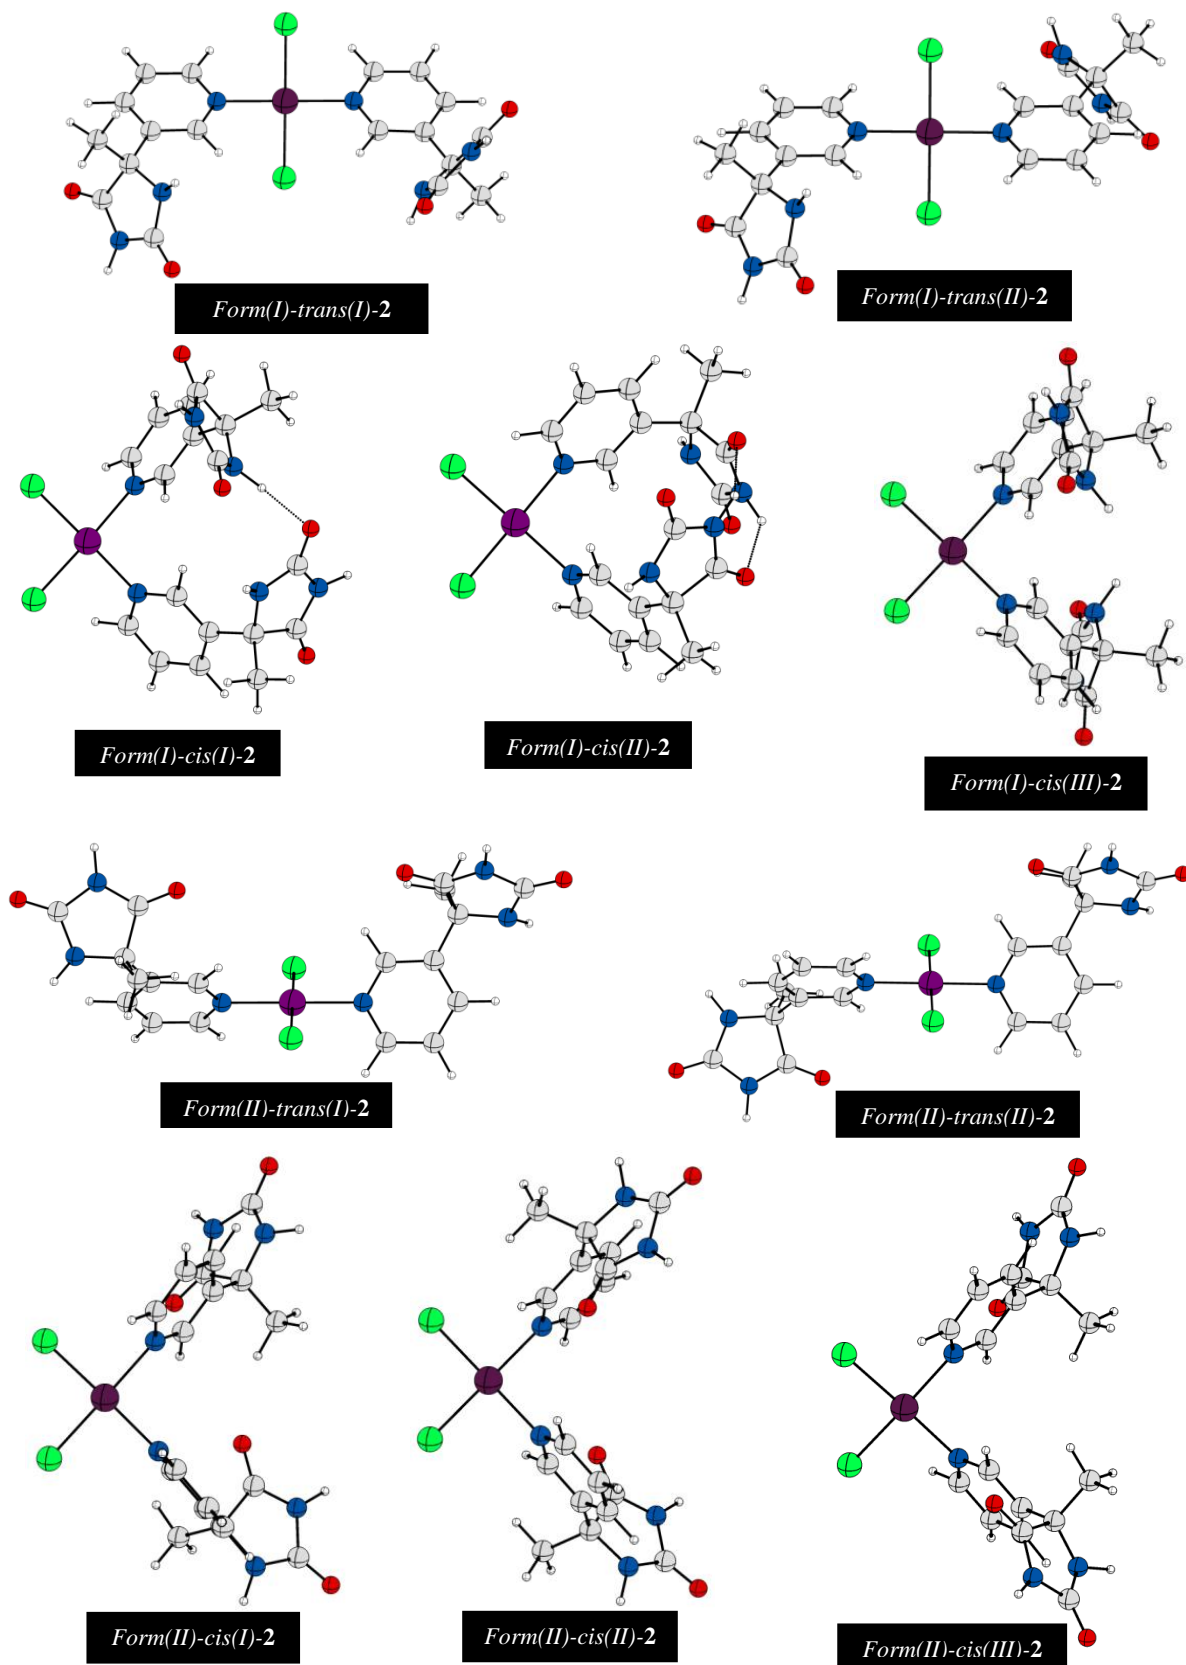

**Figure A.19.** Optimized structures of all possible conformers for **2** at BP86/TZVP level of theory

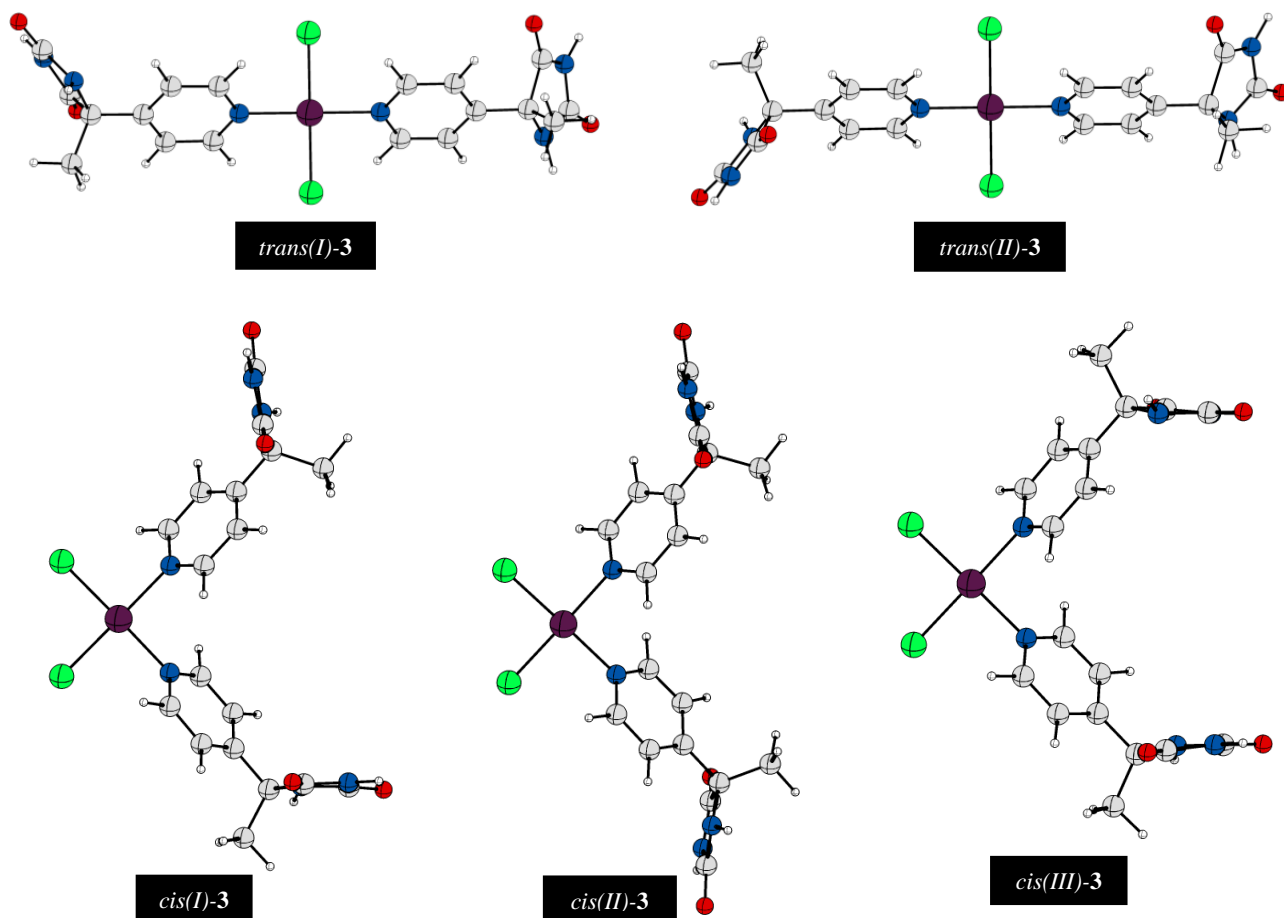

Figure A.20. Optimized structures of all possible conformers for **3** at BP86/TZVP level of theory

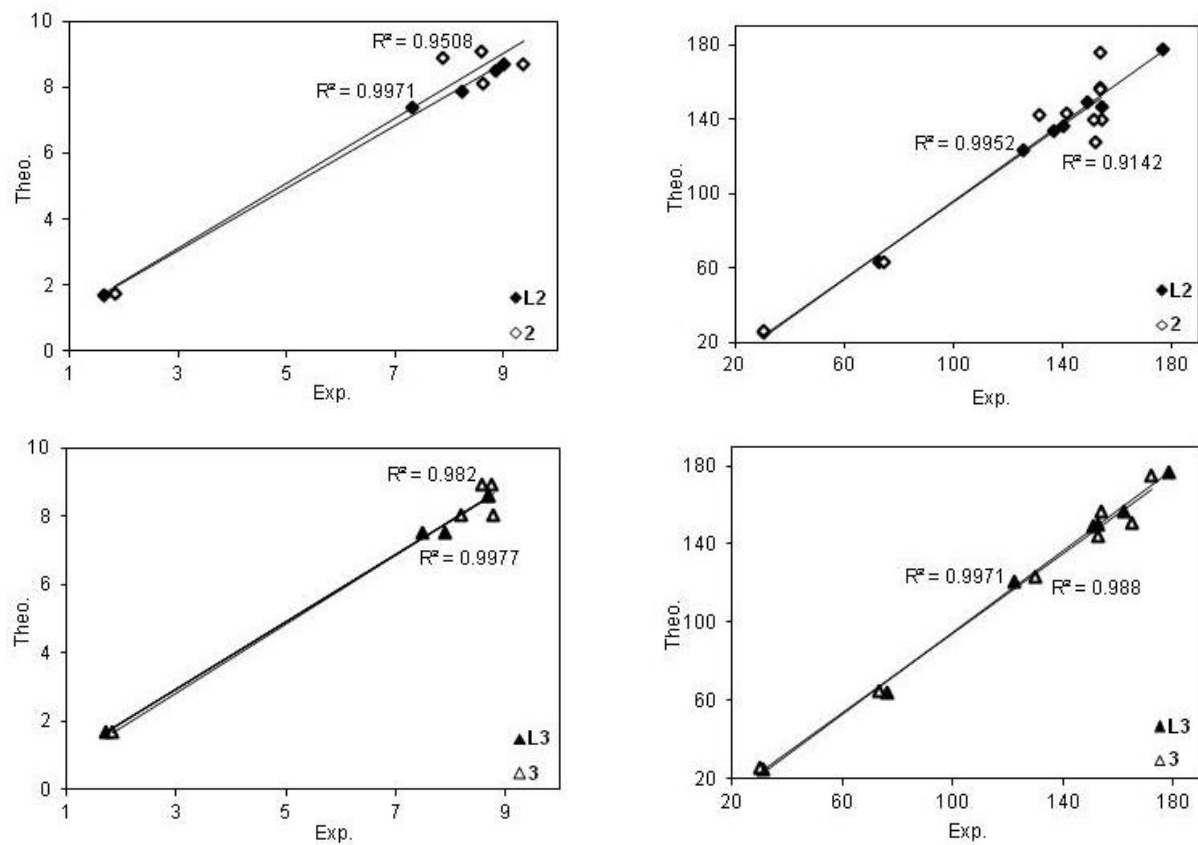

**Figure A.21.** Correlations between theoretical and corresponding experimental values of  $^1\text{H}$  (the left) and  $^{13}\text{C}$  (the right) chemical shifts ( $\delta$ , ppm) for **L2**, **L3**, **2**, and **3**

**Table A.1.** Selected bond lengths (Å) and angles (°) for **L1** and **1**

| <b>L1</b>      |           |           | <b>1</b>          |           |  |
|----------------|-----------|-----------|-------------------|-----------|--|
|                | BP86/TZVP | Exp. [64] |                   | BP86/TZVP |  |
| Bond lengths   |           |           | Bond lengths      |           |  |
| C(1)–N(1)      | 1.342     | 1.332     | Au(1)–Cl(1)       | 2.317     |  |
| C(5)–N(1)      | 1.342     | 1.333     | Au(1)–Cl(2)       | 2.276     |  |
| C(6)–C(8)      | 1.553     | 1.538     | Au(1)–N(1)        | 2.095     |  |
| C(8)–O(1)      | 1.219     | 1.207     | Au(1)–N(3)        | 2.034     |  |
| C(8)–N(3)      | 1.375     | 1.361     | N(1)–C(1)         | 1.348     |  |
| C(9)–N(3)      | 1.420     | 1.383     | N(1)–C(5)         | 1.360     |  |
| C(9)–O(2)      | 1.216     | 1.233     | N(3)–C(6)         | 1.466     |  |
| C(9)–N(2)      | 1.380     | 1.331     | N(3)–C(9)         | 1.378     |  |
| C(6)–N(2)      | 1.463     | 1.461     | C(5)–C(6)         | 1.518     |  |
| N(2)–H(2B)     | 1.020     | 0.900     | Bond angles       |           |  |
| N(3)–H(3B)     | 1.016     | 0.850     | Cl(1)–Au(1)–Cl(2) | 90.81     |  |
| Bond angles    |           |           | Cl(1)–Au(1)–N(3)  | 173.67    |  |
| C(7)–C(6)–C(5) | 109.96    | 114.34    | Cl(1)–Au(1)–N(1)  | 94.31     |  |
| C(7)–C(6)–C(8) | 109.55    | 110.39    | Cl(2)–Au(1)–N(3)  | 95.45     |  |
| N(2)–C(6)–C(7) | 112.00    | 112.31    | Cl(2)–Au(1)–N(1)  | 174.33    |  |
| C(5)–C(6)–C(8) | 112.13    | 107.55    | N(3)–Au(1)–N(1)   | 79.38     |  |
| N(2)–C(6)–C(8) | 102.04    | 100.19    | Au(1)–N(3)–C(6)   | 112.59    |  |
| N(2)–C(6)–C(5) | 110.94    | 111.05    | Au(1)–N(1)–C(5)   | 114.47    |  |

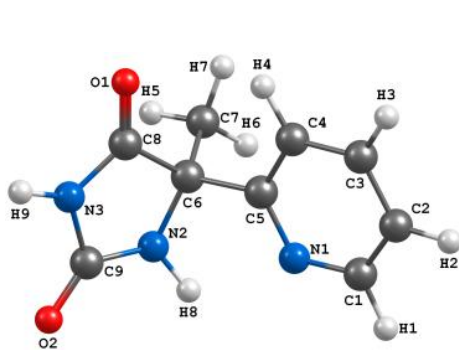

**L1**

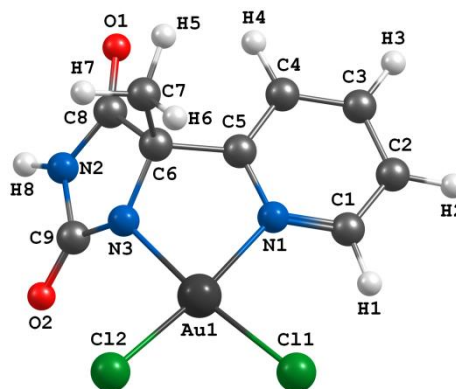

**1**

**Table A.2.** Selected bond lengths (Å) and angles (°) for **L2** and **2**

| <b>L2</b>      |           | <i>trans-2</i>    |           |
|----------------|-----------|-------------------|-----------|
|                | BP86/TZVP |                   | BP86/TZVP |
| Bond lengths   |           | Bond lengths      |           |
| C(1)–N(1)      | 1.342     | Au(1)–Cl(1)       | 2.312     |
| C(2)–N(1)      | 1.340     | Au(1)–Cl(2)       | 2.316     |
| C(1)–C(5)      | 1.402     | Au(1)–N(1)        | 2.055     |
| C(5)–O(7)      | 1.530     | Au(1)–N(4)        | 2.055     |
| C(7)–N(2)      | 1.462     | N(1)–C(3)         | 1.353     |
| C(6)–N(2)      | 1.375     | N(1)–C(4)         | 1.349     |
| C(6)–O(1)      | 1.216     | N(4)–C(12)        | 1.353     |
| C(6)–N(3)      | 1.417     | N(4)–C(13)        | 1.349     |
| C(8)–N(3)      | 1.376     | C(5)–C(7)         | 1.529     |
| N(2)–H(3)      | 1.014     | Bond angles       |           |
| N(3)–H(4)      | 1.016     | Cl(1)–Au(1)–Cl(2) | 179.92    |
| Bond angles    |           | Cl(1)–Au(1)–N(4)  | 89.88     |
| C(1)–C(5)–C(7) | 121.94    | Cl(1)–Au(1)–N(1)  | 89.96     |
| C(1)–C(5)–C(4) | 117.34    | Cl(2)–Au(1)–N(4)  | 90.06     |
| C(5)–C(7)–N(2) | 113.10    | Cl(2)–Au(1)–N(1)  | 90.08     |
| C(5)–C(7)–C(8) | 109.81    | N(4)–Au(1)–N(1)   | 179.74    |
| C(5)–C(7)–C(9) | 111.61    | Au(1)–N(4)–C(12)  | 119.72    |
| N(2)–C(6)–N(3) | 105.20    | Au(1)–N(1)–C(4)   | 119.30    |

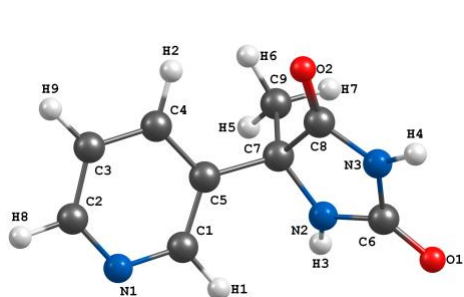

**L2**

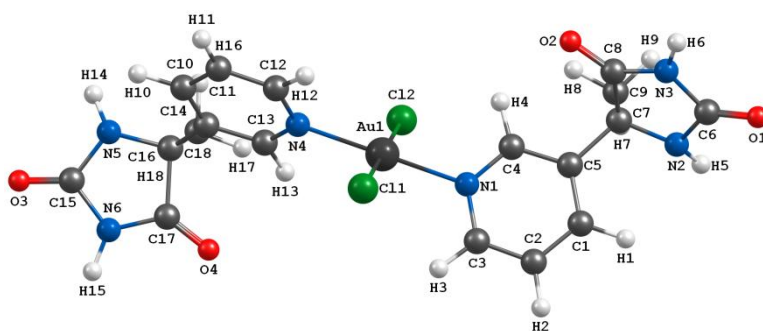

*trans-2*



**Table A.3.** Selected bond lengths (Å) and angles (°) for **L3** and **3**

| <b>L3</b>      |           | <i>trans-3</i>    |           |
|----------------|-----------|-------------------|-----------|
|                | BP86/TZVP |                   | BP86/TZVP |
| Bond lengths   |           | Bond lengths      |           |
| C(1)–N(1)      | 1.352     | Au(1)–Cl(1)       | 2.313     |
| C(5)–N(1)      | 1.354     | Au(1)–Cl(2)       | 2.314     |
| C(6)–C(9)      | 1.538     | Au(1)–N(1)        | 2.055     |
| C(6)–N(3)      | 1.488     | Au(1)–N(4)        | 2.056     |
| C(6)–C(7)      | 1.557     | N(1)–C(1)         | 1.351     |
| C(7)–O(1)      | 1.216     | N(1)–C(5)         | 1.353     |
| C(7)–N(2)      | 1.386     | N(4)–C(10)        | 1.352     |
| C(8)–N(2)      | 1.421     | N(4)–C(14)        | 1.354     |
| C(8)–N(2)      | 1.407     | C(12)–C(15)       | 1.524     |
| N(2)–H(5)      | 1.033     | C(15)–C(18)       | 1.543     |
| N(3)–H(6)      | 1.036     | Bond angles       |           |
| Bond angles    |           | Cl(1)–Au(1)–Cl(2) | 179.75    |
| C(3)–C(6)–C(7) | 110.63    | Cl(1)–Au(1)–N(4)  | 90.13     |
| C(3)–C(6)–C(9) | 112.26    | Cl(1)–Au(1)–N(1)  | 89.87     |
| C(3)–C(6)–N(3) | 111.65    | Cl(2)–Au(1)–N(4)  | 90.07     |
| C(2)–C(3)–C(6) | 121.22    | Cl(2)–Au(1)–N(1)  | 89.91     |
| C(4)–C(3)–C(6) | 121.22    | N(4)–Au(1)–N(1)   | 179.81    |
| N(2)–C(8)–N(3) | 105.79    | Au(1)–N(1)–C(1)   | 120.02    |

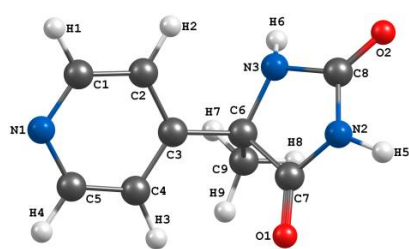

**L3**

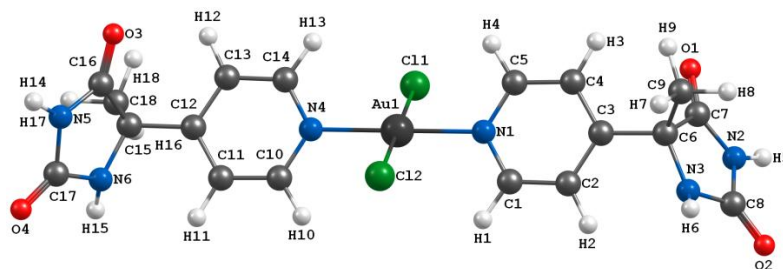

*trans-3*

**Table A.4.** Electronic energies (Hartree) of all possible isomers and conformers for **L2**, **2** and **3** at BP86/TZVP level

| Compounds                   | Gas           | Solvation     |               |               |
|-----------------------------|---------------|---------------|---------------|---------------|
|                             |               | Water         | Ethanol       | Water/Ethanol |
| <b>2</b>                    |               |               |               |               |
| <i>form(I)-L2</i>           | -663.3823400  | -663.4103065  | -663.4092305  | -663.4097685  |
| <i>form(I)-Trans(I)-2</i>   | -2383.0309705 | -2383.1363859 | -2383.1310676 | -2383.1337267 |
| <i>form(I)-Trans(II)-2</i>  | -2383.0309112 | -2383.1367312 | -2383.1312273 | -2383.1339792 |
| <i>form(I)-Cis(I)-2</i>     | -2383.0218326 | -2383.124992  | -2383.1151803 | -2383.1200861 |
| <i>form(I)-Cis(II)-2</i>    | -2383.0226522 | -2383.1229134 | -2383.1179335 | -2383.1204234 |
| <i>form(I)-Cis(III)-2</i>   | -2383.014657  | -2383.123489  | -2383.123489  | -2383.123489  |
| <i>form(II)-L2</i>          | -663.3828808  | -663.4102839  | -663.4092584  | -663.40977115 |
| <i>form(II)-Trans(I)-2</i>  | -2383.0315743 | -2383.1357294 | -2383.1297376 | -2383.1327335 |
| <i>form(II)-Trans(II)-2</i> | -2383.0318944 | -2383.1358501 | -2383.129662  | -2383.1327560 |
| <i>form(II)-Cis(I)-2</i>    | -2383.0182727 | -2383.1295312 | -2383.1233069 | -2383.1264190 |
| <i>form(II)-Cis(II)-2</i>   | -2383.021099  | -2383.1308115 | -2383.1250054 | -2383.1279084 |
| <i>form(II)-Cis(III)-2</i>  | -2383.0157658 | -2383.1267385 | -2383.120279  | -2383.1235087 |
| <b>3</b>                    |               |               |               |               |
| <i>Trans(I)-3</i>           | -2383.0333242 | -2383.1393298 | -2383.1345057 | -2383.1369177 |
| <i>Trans(II)-3</i>          | -2383.0333949 | -2383.1393462 | -2383.1345271 | -2383.1369366 |
| <i>Cis(I)-3</i>             | -2383.0197641 | -2383.1341201 | -2383.1306531 | -2383.1323866 |
| <i>Cis(II)-3</i>            | -2383.0188748 | -2383.1339585 | -2383.128709  | -2383.1313337 |
| <i>Cis(III)-3</i>           | -2383.0206418 | -2383.134612  | -2383.1293758 | -2383.1319939 |

Cartesian coordinate representation of the optimized molecular structures of **L1**, **L2**, **L3** and corresponding Au(III) complexes at BP86/TZVP level of theory

| <b>L1</b> |             |              |              |
|-----------|-------------|--------------|--------------|
| C         | 5.621892000 | 8.306998000  | -1.019618000 |
| H         | 6.181025000 | 7.534026000  | -1.555344000 |
| C         | 6.223511000 | 9.520904000  | -0.684408000 |
| H         | 7.263881000 | 9.713130000  | -0.950745000 |
| C         | 5.460064000 | 10.470451000 | -0.000952000 |
| H         | 5.893038000 | 11.430697000 | 0.286555000  |
| C         | 4.133466000 | 10.176021000 | 0.315054000  |
| H         | 3.503790000 | 10.883927000 | 0.855702000  |
| C         | 3.622318000 | 8.925151000  | -0.057317000 |
| C         | 2.158584000 | 8.535046000  | 0.207849000  |
| C         | 1.233964000 | 9.238473000  | -0.806868000 |
| H         | 0.193473000 | 8.919484000  | -0.654634000 |
| H         | 1.539029000 | 8.976485000  | -1.829736000 |
| H         | 1.294671000 | 10.328065000 | -0.682426000 |
| C         | 1.710490000 | 8.890177000  | 1.652638000  |
| C         | 1.700473000 | 6.562605000  | 1.430219000  |
| N         | 4.349211000 | 8.006874000  | -0.713589000 |
| N         | 1.992307000 | 7.081128000  | 0.185011000  |
| H         | 2.627207000 | 6.552994000  | -0.415134000 |
| N         | 1.447434000 | 7.685995000  | 2.262793000  |
| H         | 1.140800000 | 7.587182000  | 3.226766000  |
| O         | 1.590807000 | 10.004748000 | 2.132391000  |
| O         | 1.644004000 | 5.399611000  | 1.780624000  |

| <b>1</b> |              |              |              |
|----------|--------------|--------------|--------------|
| C        | -0.230953000 | 2.637180000  | -0.568182000 |
| H        | 0.803828000  | 2.896545000  | -0.801157000 |
| C        | -1.289093000 | 3.534421000  | -0.656440000 |
| H        | -1.097610000 | 4.554372000  | -0.989295000 |
| C        | -2.573475000 | 3.103806000  | -0.314886000 |
| H        | -3.422270000 | 3.786470000  | -0.382695000 |
| C        | -2.765480000 | 1.790379000  | 0.113004000  |
| H        | -3.750283000 | 1.403291000  | 0.378325000  |
| C        | -1.671977000 | 0.925723000  | 0.177880000  |
| C        | -1.743820000 | -0.515228000 | 0.650625000  |
| C        | -1.847802000 | -0.572976000 | 2.189669000  |
| H        | -2.777070000 | -0.095350000 | 2.528608000  |
| H        | -0.988400000 | -0.062347000 | 2.646561000  |
| H        | -1.843833000 | -1.622121000 | 2.514022000  |
| C        | -2.956205000 | -1.265150000 | 0.015470000  |
| C        | -0.954482000 | -2.196095000 | -0.792268000 |
| N        | -0.431222000 | 1.366920000  | -0.162349000 |

|    |              |              |              |
|----|--------------|--------------|--------------|
| N  | -2.396055000 | -2.239613000 | -0.752738000 |
| H  | -2.920576000 | -2.911300000 | -1.308373000 |
| N  | -0.582666000 | -1.249330000 | 0.137945000  |
| O  | -4.137376000 | -1.018494000 | 0.201614000  |
| O  | -0.287437000 | -2.899848000 | -1.520465000 |
| Au | 1.075739000  | -0.081185000 | -0.014369000 |
| Cl | 2.806965000  | 1.450652000  | -0.185426000 |
| Cl | 2.564163000  | -1.781912000 | 0.256709000  |

*form(I)-L2*

|   |              |              |              |
|---|--------------|--------------|--------------|
| C | 3.062296000  | 0.877640000  | -0.373618000 |
| C | 1.834168000  | 0.214369000  | -0.390181000 |
| C | 0.665247000  | 0.972118000  | -0.479789000 |
| N | 0.661457000  | 2.313392000  | -0.544228000 |
| C | 1.847305000  | 2.937506000  | -0.531354000 |
| C | 3.086196000  | 2.274287000  | -0.456335000 |
| C | 6.402850000  | 2.412575000  | 0.668992000  |
| N | 5.578854000  | 2.203762000  | -0.415327000 |
| C | 4.396787000  | 3.066526000  | -0.439323000 |
| C | 4.545065000  | 3.808693000  | 0.930307000  |
| N | 5.709036000  | 3.330781000  | 1.493839000  |
| C | 4.467808000  | 4.099025000  | -1.581676000 |
| O | 7.493853000  | 1.926150000  | 0.898826000  |
| O | 3.790603000  | 4.644582000  | 1.385914000  |
| H | 3.995517000  | 0.318057000  | -0.290486000 |
| H | 1.785868000  | -0.874457000 | -0.330601000 |
| H | 1.807566000  | 4.029516000  | -0.564061000 |
| H | 5.966659000  | 1.773080000  | -1.249033000 |
| H | 6.085362000  | 3.646572000  | 2.383699000  |
| H | 4.382173000  | 3.592456000  | -2.554128000 |
| H | 3.649137000  | 4.824340000  | -1.494398000 |
| H | 5.420983000  | 4.645545000  | -1.544631000 |
| H | -0.315384000 | 0.486371000  | -0.496672000 |

*form(II)-L2*

|   |             |             |              |
|---|-------------|-------------|--------------|
| C | 3.001255000 | 0.914995000 | -0.414654000 |
| N | 1.858927000 | 0.209462000 | -0.411591000 |
| C | 0.708714000 | 0.897279000 | -0.370347000 |
| C | 0.652422000 | 2.293576000 | -0.327636000 |
| C | 1.845360000 | 3.013799000 | -0.342938000 |
| C | 3.062122000 | 2.316364000 | -0.392578000 |
| C | 6.383970000 | 2.412486000 | 0.716151000  |
| N | 5.556203000 | 2.183074000 | -0.358491000 |
| C | 4.394365000 | 3.069579000 | -0.418224000 |
| C | 4.571855000 | 3.877694000 | 0.908317000  |
| N | 5.719297000 | 3.393520000 | 1.494890000  |

|   |              |             |              |
|---|--------------|-------------|--------------|
| C | 4.476580000  | 4.038083000 | -1.615781000 |
| O | 7.458535000  | 1.904202000 | 0.973041000  |
| O | 3.845768000  | 4.762298000 | 1.320513000  |
| H | 3.922789000  | 0.326551000 | -0.427543000 |
| H | 1.834604000  | 4.103215000 | -0.289187000 |
| H | 5.914233000  | 1.670902000 | -1.158185000 |
| H | 6.109197000  | 3.744453000 | 2.365497000  |
| H | 4.379469000  | 3.479276000 | -2.558065000 |
| H | 3.667044000  | 4.777417000 | -1.565471000 |
| H | 5.437304000  | 4.572572000 | -1.613141000 |
| H | -0.209635000 | 0.301690000 | -0.367070000 |
| H | -0.309495000 | 2.807216000 | -0.280706000 |

*form(I)-Trans(I)-2*

|    |              |              |              |
|----|--------------|--------------|--------------|
| C  | -0.643976000 | 2.790423000  | 0.124196000  |
| N  | -1.812311000 | 2.112939000  | 0.183753000  |
| C  | -2.990135000 | 2.767716000  | 0.283923000  |
| C  | -3.018666000 | 4.156986000  | 0.316057000  |
| C  | -1.825478000 | 4.874055000  | 0.247208000  |
| C  | -0.606406000 | 4.183326000  | 0.151423000  |
| C  | 2.750166000  | 4.305737000  | 1.189243000  |
| N  | 1.877903000  | 4.026071000  | 0.138058000  |
| C  | 0.728362000  | 4.926541000  | 0.105995000  |
| C  | 0.900234000  | 5.705927000  | 1.458198000  |
| N  | 2.082462000  | 5.260157000  | 1.994741000  |
| C  | 0.784058000  | 5.921729000  | -1.070924000 |
| O  | 3.845192000  | 3.834048000  | 1.392764000  |
| O  | 0.127402000  | 6.527717000  | 1.906753000  |
| H  | 0.270293000  | 2.205087000  | 0.052180000  |
| H  | -3.891376000 | 2.162200000  | 0.354160000  |
| H  | -3.979366000 | 4.664600000  | 0.401397000  |
| H  | -1.835960000 | 5.963026000  | 0.294354000  |
| H  | 2.305522000  | 3.690428000  | -0.723027000 |
| H  | 2.486823000  | 5.612625000  | 2.860010000  |
| H  | 0.687272000  | 5.387759000  | -2.027448000 |
| H  | -0.025516000 | 6.659255000  | -0.997583000 |
| H  | 1.740256000  | 6.462729000  | -1.060670000 |
| Au | -1.785540000 | 0.055543000  | 0.116879000  |
| C  | -0.564325000 | -2.643206000 | -0.005385000 |
| N  | -1.752102000 | -2.001094000 | 0.051076000  |
| C  | -2.914714000 | -2.689671000 | 0.058878000  |
| C  | -2.906489000 | -4.077788000 | -0.007135000 |
| C  | -1.691568000 | -4.759759000 | -0.049746000 |
| C  | -0.488647000 | -4.034991000 | -0.037056000 |
| C  | 2.797271000  | -3.991909000 | -1.280405000 |
| N  | 1.986520000  | -3.802827000 | -0.161459000 |

|    |              |              |              |
|----|--------------|--------------|--------------|
| C  | 0.866168000  | -4.738345000 | -0.113670000 |
| C  | 0.971919000  | -5.429624000 | -1.520138000 |
| N  | 2.104066000  | -4.914960000 | -2.101155000 |
| C  | 1.023941000  | -5.799120000 | 0.993792000  |
| O  | 3.865304000  | -3.477811000 | -1.520089000 |
| O  | 0.193744000  | -6.246451000 | -1.967957000 |
| H  | 0.335162000  | -2.031776000 | -0.050204000 |
| H  | -3.834628000 | -2.112933000 | 0.129170000  |
| H  | -3.855966000 | -4.612796000 | -0.019720000 |
| H  | -1.676291000 | -5.847602000 | -0.115691000 |
| H  | 2.461003000  | -3.510726000 | 0.690766000  |
| H  | 2.459664000  | -5.199214000 | -3.011722000 |
| H  | 0.961444000  | -5.329222000 | 1.986189000  |
| H  | 0.240217000  | -6.563507000 | 0.917515000  |
| H  | 1.997339000  | -6.299442000 | 0.898186000  |
| Cl | -0.460237000 | 0.134046000  | -1.780340000 |
| Cl | -3.119693000 | -0.031610000 | 2.005018000  |

*form(I)-Trans(II)-2*

|    |              |              |              |
|----|--------------|--------------|--------------|
| Au | 0.139211000  | -0.058072000 | 0.097635000  |
| C  | 2.837576000  | -6.039048000 | 0.443237000  |
| C  | 1.286124000  | 2.675902000  | 0.316138000  |
| C  | 1.283841000  | 4.057187000  | 0.469519000  |
| C  | 0.075378000  | 4.731475000  | 0.636331000  |
| C  | -1.127581000 | 4.006795000  | 0.647173000  |
| C  | -4.502178000 | 4.154012000  | -0.324034000 |
| C  | 2.847412000  | -5.384871000 | -2.011789000 |
| C  | -2.478309000 | 4.707041000  | 0.791929000  |
| C  | -2.689646000 | 5.620404000  | -0.468001000 |
| C  | 2.722808000  | -4.855355000 | -0.537985000 |
| C  | -2.539527000 | 5.569526000  | 2.068696000  |
| C  | 4.695495000  | -4.026249000 | -1.570844000 |
| C  | 1.379379000  | -4.137812000 | -0.411457000 |
| C  | 0.165178000  | -4.835755000 | -0.516739000 |
| C  | -1.039676000 | -4.140389000 | -0.428449000 |
| C  | -1.026638000 | -2.765290000 | -0.227998000 |
| C  | 1.325564000  | -2.754652000 | -0.245498000 |
| C  | -1.059003000 | 2.623854000  | 0.488138000  |
| Cl | 1.473988000  | 0.164083000  | -1.778338000 |
| Cl | -1.192459000 | -0.294974000 | 1.978037000  |
| H  | -3.511242000 | 6.078202000  | 2.132003000  |
| H  | -4.010076000 | 3.347591000  | 1.504493000  |
| H  | 0.062189000  | 5.817081000  | 0.732003000  |
| H  | -1.754128000 | 6.336137000  | 2.060751000  |
| H  | -2.408227000 | 4.940543000  | 2.961238000  |
| H  | 2.232401000  | 4.593540000  | 0.448260000  |

|   |              |              |              |
|---|--------------|--------------|--------------|
| H | 2.199331000  | 2.105248000  | 0.160427000  |
| H | -1.959124000 | 2.012534000  | 0.485827000  |
| H | 3.805337000  | -6.542245000 | 0.311897000  |
| H | 2.045049000  | -6.776247000 | 0.262149000  |
| H | 2.758567000  | -5.685670000 | 1.481706000  |
| H | 4.375166000  | -5.021279000 | -3.435141000 |
| H | 4.321809000  | -3.763989000 | 0.433903000  |
| H | -4.295404000 | 5.635176000  | -1.851430000 |
| H | 0.163994000  | -5.911715000 | -0.689444000 |
| H | -1.997027000 | -4.654773000 | -0.510528000 |
| H | -1.938065000 | -2.180815000 | -0.119695000 |
| H | 2.235040000  | -2.157284000 | -0.214290000 |
| N | 3.860801000  | -3.943872000 | -0.455984000 |
| N | 0.147025000  | -2.100605000 | -0.148645000 |
| N | 0.123271000  | 1.987516000  | 0.331838000  |
| N | -3.606800000 | 3.786983000  | 0.679248000  |
| N | -3.869472000 | 5.204166000  | -1.033354000 |
| N | 4.003955000  | -4.834532000 | -2.505728000 |
| O | -1.943188000 | 6.503951000  | -0.836164000 |
| O | 5.780112000  | -3.514474000 | -1.725938000 |
| O | 2.063228000  | -6.127471000 | -2.565462000 |
| O | -5.589389000 | 3.679652000  | -0.560772000 |

*form(I)-Cis(I)-2*

|    |              |              |              |
|----|--------------|--------------|--------------|
| Au | -2.657989000 | 1.761093000  | 1.572465000  |
| C  | 1.770812000  | -2.910512000 | 2.558894000  |
| C  | -3.251569000 | 1.794512000  | -1.370449000 |
| C  | -2.993398000 | 1.941598000  | -2.727941000 |
| C  | -1.674982000 | 2.047461000  | -3.174518000 |
| C  | -0.620315000 | 1.984891000  | -2.251879000 |
| C  | 2.590563000  | 2.665704000  | -1.127770000 |
| C  | 0.766838000  | -3.599703000 | 0.318656000  |
| C  | 0.849548000  | 2.142982000  | -2.650511000 |
| C  | 1.166296000  | 3.683216000  | -2.677505000 |
| C  | 0.929604000  | -2.438857000 | 1.360394000  |
| C  | 1.168143000  | 1.536613000  | -4.027763000 |
| C  | 1.855894000  | -1.835055000 | -0.738910000 |
| C  | -0.474999000 | -1.991020000 | 1.780891000  |
| C  | -1.374935000 | -2.867123000 | 2.409042000  |
| C  | -2.651557000 | -2.414480000 | 2.738885000  |
| C  | -3.010908000 | -1.098253000 | 2.464071000  |
| C  | -0.909606000 | -0.693361000 | 1.516952000  |
| C  | -0.956919000 | 1.852884000  | -0.902438000 |
| Cl | -3.222581000 | 3.956568000  | 1.315750000  |
| Cl | -3.147474000 | 1.860644000  | 3.800771000  |
| H  | 2.242314000  | 1.635739000  | -4.233185000 |

|   |              |              |              |
|---|--------------|--------------|--------------|
| H | 2.101889000  | 0.702046000  | -1.609993000 |
| H | -1.473094000 | 2.186995000  | -4.236175000 |
| H | 0.625820000  | 2.065073000  | -4.822335000 |
| H | 0.905637000  | 0.469532000  | -4.054488000 |
| H | -3.829571000 | 1.985305000  | -3.425866000 |
| H | -4.263118000 | 1.730517000  | -0.972580000 |
| H | -0.173070000 | 1.852976000  | -0.145329000 |
| H | 2.760992000  | -3.244549000 | 2.220053000  |
| H | 1.279670000  | -3.752373000 | 3.063610000  |
| H | 1.897535000  | -2.093543000 | 3.283718000  |
| H | 1.362923000  | -3.658894000 | -1.723122000 |
| H | 2.209246000  | -0.710005000 | 0.958434000  |
| H | 2.602062000  | 4.764040000  | -1.550003000 |
| H | -1.086145000 | -3.898538000 | 2.614059000  |
| H | -3.375721000 | -3.072752000 | 3.218912000  |
| H | -3.981191000 | -0.688935000 | 2.739610000  |
| H | -0.252568000 | 0.015721000  | 1.017581000  |
| N | 1.603855000  | -1.421662000 | 0.553602000  |
| N | -2.141882000 | -0.261763000 | 1.856076000  |
| N | -2.233608000 | 1.751483000  | -0.481879000 |
| N | 1.746989000  | 1.670220000  | -1.600476000 |
| N | 2.164097000  | 3.866804000  | -1.748949000 |
| N | 1.316134000  | -3.125633000 | -0.856933000 |
| O | 0.620070000  | 4.504705000  | -3.381983000 |
| O | 2.411574000  | -1.207773000 | -1.628441000 |
| O | 0.242620000  | -4.673052000 | 0.516623000  |
| O | 3.494444000  | 2.554978000  | -0.326231000 |

*form(I)-Cis(II)-2*

|   |              |              |              |
|---|--------------|--------------|--------------|
| C | -2.284261000 | 1.357390000  | -0.490654000 |
| N | -1.437452000 | 1.883409000  | 0.420487000  |
| C | -0.333631000 | 2.554261000  | 0.021542000  |
| C | -0.036467000 | 2.680461000  | -1.330918000 |
| C | -0.888539000 | 2.117823000  | -2.281214000 |
| C | -2.049428000 | 1.449215000  | -1.863563000 |
| C | -4.413379000 | -1.047653000 | -2.147371000 |
| N | -4.236076000 | 0.328275000  | -2.214868000 |
| C | -2.980012000 | 0.721463000  | -2.844908000 |
| C | -2.314534000 | -0.678227000 | -3.087526000 |
| N | -3.204157000 | -1.610088000 | -2.637641000 |
| C | -3.175768000 | 1.468323000  | -4.172998000 |
| O | -5.374076000 | -1.659540000 | -1.739033000 |
| O | -1.196958000 | -0.854006000 | -3.548155000 |
| H | -3.170842000 | 0.847329000  | -0.115730000 |
| H | 0.288375000  | 2.989079000  | 0.802297000  |
| H | 0.866749000  | 3.212924000  | -1.628719000 |



|    |              |              |              |
|----|--------------|--------------|--------------|
| H  | -0.643283000 | 2.195739000  | -3.340069000 |
| H  | -5.063206000 | 0.920049000  | -2.236690000 |
| H  | -2.977968000 | -2.605425000 | -2.540782000 |
| H  | -3.581406000 | 2.475012000  | -3.997345000 |
| H  | -2.225744000 | 1.558255000  | -4.714957000 |
| H  | -3.873933000 | 0.911291000  | -4.812069000 |
| Au | -1.827561000 | 1.633762000  | 2.470742000  |
| C  | -1.056267000 | -1.148121000 | 1.621614000  |
| N  | -2.029454000 | -0.445771000 | 2.240954000  |
| C  | -3.138169000 | -1.069622000 | 2.698335000  |
| C  | -3.307732000 | -2.436149000 | 2.505347000  |
| C  | -2.322428000 | -3.168099000 | 1.842723000  |
| C  | -1.159197000 | -2.521966000 | 1.397129000  |
| C  | 1.414571000  | -2.060165000 | -0.853842000 |
| N  | 1.134597000  | -2.441692000 | 0.452037000  |
| C  | -0.079623000 | -3.241543000 | 0.575342000  |
| C  | -0.602761000 | -3.223540000 | -0.903459000 |
| N  | 0.309539000  | -2.510269000 | -1.625358000 |
| C  | 0.187467000  | -4.681099000 | 1.040440000  |
| O  | 2.375661000  | -1.451659000 | -1.266250000 |
| O  | -1.650739000 | -3.722775000 | -1.283687000 |
| H  | -0.173529000 | -0.600384000 | 1.293722000  |
| H  | -3.868048000 | -0.455977000 | 3.223927000  |
| H  | -4.216479000 | -2.915164000 | 2.869657000  |
| H  | -2.465996000 | -4.234388000 | 1.670079000  |
| H  | 1.909590000  | -2.526874000 | 1.105461000  |
| H  | 0.155668000  | -2.215796000 | -2.595335000 |
| H  | 0.491565000  | -4.698719000 | 2.096865000  |
| H  | -0.707736000 | -5.304073000 | 0.918545000  |
| H  | 0.988394000  | -5.124105000 | 0.433490000  |
| Cl | -1.594337000 | 3.886414000  | 2.742030000  |
| Cl | -2.266729000 | 1.384080000  | 4.694964000  |

*form(I)-Cis(III)-2*

|   |              |             |              |
|---|--------------|-------------|--------------|
| C | -1.098868000 | 1.632855000 | -0.581125000 |
| N | -2.167799000 | 1.746469000 | 0.237445000  |
| C | -3.366773000 | 2.135827000 | -0.249171000 |
| C | -3.524350000 | 2.408813000 | -1.603648000 |
| C | -2.430747000 | 2.294949000 | -2.460724000 |
| C | -1.184867000 | 1.895664000 | -1.948409000 |
| C | 2.283348000  | 2.377292000 | -2.212755000 |
| N | 1.256157000  | 1.435644000 | -2.098598000 |
| C | 0.056581000  | 1.824543000 | -2.837401000 |
| C | 0.414572000  | 3.292082000 | -3.272852000 |
| N | 1.702420000  | 3.502273000 | -2.842675000 |
| C | -0.174475000 | 0.960895000 | -4.092334000 |

|    |              |              |              |
|----|--------------|--------------|--------------|
| O  | 3.429576000  | 2.266619000  | -1.844511000 |
| O  | -0.321382000 | 4.052280000  | -3.865410000 |
| H  | -0.147564000 | 1.351233000  | -0.130719000 |
| H  | -4.179435000 | 2.247232000  | 0.466938000  |
| H  | -4.499119000 | 2.728822000  | -1.971886000 |
| H  | -2.535779000 | 2.545233000  | -3.516307000 |
| H  | 1.556272000  | 0.462794000  | -2.078869000 |
| H  | 2.228144000  | 4.358280000  | -3.009908000 |
| H  | -0.415148000 | -0.073830000 | -3.806889000 |
| H  | -0.999636000 | 1.358983000  | -4.696393000 |
| H  | 0.729438000  | 0.954952000  | -4.716783000 |
| Au | -1.918559000 | 1.507254000  | 2.306370000  |
| C  | -2.273918000 | -1.405785000 | 1.663562000  |
| N  | -1.373340000 | -0.510000000 | 2.124138000  |
| C  | -0.171248000 | -0.920195000 | 2.585269000  |
| C  | 0.165482000  | -2.269461000 | 2.576801000  |
| C  | -0.753020000 | -3.205353000 | 2.103562000  |
| C  | -2.003896000 | -2.773971000 | 1.630976000  |
| C  | -5.417459000 | -3.583201000 | 1.479055000  |
| N  | -4.310801000 | -3.116893000 | 0.762992000  |
| C  | -3.067408000 | -3.769565000 | 1.168033000  |
| C  | -3.534208000 | -4.586863000 | 2.427198000  |
| N  | -4.890515000 | -4.386382000 | 2.516874000  |
| C  | -2.530190000 | -4.740270000 | 0.098793000  |
| O  | -6.584483000 | -3.347272000 | 1.269093000  |
| O  | -2.815240000 | -5.246791000 | 3.147088000  |
| H  | -3.241511000 | -1.024998000 | 1.338108000  |
| H  | 0.495181000  | -0.154916000 | 2.980060000  |
| H  | 1.137959000  | -2.577416000 | 2.961030000  |
| H  | -0.512798000 | -4.268139000 | 2.130237000  |
| H  | -4.484276000 | -2.902100000 | -0.217144000 |
| H  | -5.486916000 | -4.819715000 | 3.219462000  |
| H  | -2.209233000 | -4.186211000 | -0.795670000 |
| H  | -1.675945000 | -5.312737000 | 0.481941000  |
| H  | -3.313933000 | -5.454330000 | -0.189126000 |
| Cl | -2.552179000 | 3.684987000  | 2.554250000  |
| Cl | -1.613754000 | 1.304175000  | 4.558313000  |

*form(II)-Trans(I)-2*

|    |              |              |             |
|----|--------------|--------------|-------------|
| Au | -1.650678000 | -1.190227000 | 0.551076000 |
| C  | 0.975417000  | -3.891062000 | 2.581909000 |
| C  | -0.135616000 | -3.196018000 | 2.125661000 |
| C  | -4.741923000 | 3.478520000  | 1.766500000 |
| C  | 1.224128000  | -1.868336000 | 0.735436000 |
| C  | 2.383549000  | -2.522503000 | 1.169272000 |
| C  | 5.771371000  | -1.892993000 | 1.851727000 |

|                             |              |              |              |
|-----------------------------|--------------|--------------|--------------|
| C                           | -3.530938000 | 4.103778000  | -0.378538000 |
| C                           | 3.742794000  | -2.072423000 | 0.630501000  |
| C                           | 3.986491000  | -0.592521000 | 1.092812000  |
| C                           | -4.737939000 | 3.308815000  | 0.233291000  |
| C                           | 3.806466000  | -2.148054000 | -0.908871000 |
| C                           | -5.507533000 | 5.103353000  | -1.118035000 |
| C                           | -4.601002000 | 1.842008000  | -0.179099000 |
| C                           | -3.492615000 | 1.107741000  | 0.259953000  |
| C                           | -4.199507000 | -0.805564000 | -0.916445000 |
| C                           | -5.325664000 | -0.134197000 | -1.371062000 |
| C                           | -5.523538000 | 1.200070000  | -1.011568000 |
| C                           | 2.243797000  | -3.546484000 | 2.111669000  |
| Cl                          | -1.090368000 | -1.709010000 | -1.633593000 |
| Cl                          | -2.226848000 | -0.696271000 | 2.737374000  |
| H                           | 4.786238000  | -1.797910000 | -1.261581000 |
| H                           | 3.656383000  | -3.183873000 | -1.246424000 |
| H                           | 1.260815000  | -1.054624000 | 0.015264000  |
| H                           | -1.143097000 | -3.400959000 | 2.481680000  |
| H                           | 0.839982000  | -4.687920000 | 3.313064000  |
| H                           | 5.228888000  | -3.632072000 | 0.892603000  |
| H                           | 3.033151000  | -1.517615000 | -1.366473000 |
| H                           | 3.131148000  | -4.060451000 | 2.483932000  |
| H                           | -4.819555000 | 4.543219000  | 2.026008000  |
| H                           | -3.817327000 | 3.085430000  | 2.208616000  |
| H                           | -5.594587000 | 2.941935000  | 2.207437000  |
| H                           | -3.555096000 | 5.807068000  | -1.638275000 |
| H                           | -6.792769000 | 3.976535000  | 0.029564000  |
| H                           | 5.611321000  | 0.214037000  | 2.187411000  |
| H                           | -2.729736000 | 1.548013000  | 0.897372000  |
| H                           | -3.979137000 | -1.835023000 | -1.191063000 |
| H                           | -6.032158000 | -0.657672000 | -2.015077000 |
| H                           | -6.386227000 | 1.752712000  | -1.386384000 |
| N                           | -5.873105000 | 3.963701000  | -0.406573000 |
| N                           | -3.309886000 | -0.175981000 | -0.114584000 |
| N                           | 0.008721000  | -2.204109000 | 1.216786000  |
| N                           | 4.853745000  | -2.765475000 | 1.272650000  |
| N                           | 5.167544000  | -0.610241000 | 1.787521000  |
| N                           | -4.088466000 | 5.099120000  | -1.137665000 |
| O                           | 3.253947000  | 0.349773000  | 0.862220000  |
| O                           | -6.228413000 | 5.930404000  | -1.625600000 |
| O                           | -2.355190000 | 3.856523000  | -0.193568000 |
| O                           | 6.854508000  | -2.152039000 | 2.321848000  |
| <i>form(II)-Trans(II)-2</i> |              |              |              |
| C                           | 4.102800000  | -2.441492000 | 1.040772000  |
| C                           | 2.936330000  | -2.873505000 | 1.674483000  |

|    |              |              |              |
|----|--------------|--------------|--------------|
| C  | 1.766186000  | -2.141998000 | 1.528052000  |
| N  | 1.752722000  | -1.027956000 | 0.759950000  |
| C  | 2.864519000  | -0.605830000 | 0.121578000  |
| C  | 4.078328000  | -1.292796000 | 0.243738000  |
| C  | 7.534555000  | -0.682537000 | 0.396174000  |
| N  | 6.527656000  | -1.491296000 | -0.123343000 |
| C  | 5.320819000  | -0.745203000 | -0.461299000 |
| C  | 5.645737000  | 0.666677000  | 0.141973000  |
| N  | 6.930554000  | 0.583984000  | 0.610100000  |
| C  | 5.109415000  | -0.619581000 | -1.984132000 |
| O  | 8.683566000  | -0.976342000 | 0.629870000  |
| O  | 4.886437000  | 1.616049000  | 0.170389000  |
| H  | 5.038817000  | -2.985947000 | 1.173684000  |
| H  | 2.928362000  | -3.768938000 | 2.295812000  |
| H  | 0.837115000  | -2.415320000 | 2.023898000  |
| H  | 2.778530000  | 0.302095000  | -0.470471000 |
| H  | 6.827397000  | -2.293197000 | -0.673944000 |
| H  | 7.439732000  | 1.358435000  | 1.031128000  |
| H  | 4.908804000  | -1.607784000 | -2.423098000 |
| H  | 4.261740000  | 0.039789000  | -2.211233000 |
| H  | 6.007949000  | -0.197542000 | -2.454768000 |
| Au | 0.013117000  | 0.050022000  | 0.570138000  |
| C  | -4.099457000 | 2.515372000  | 0.174128000  |
| C  | -3.025786000 | 3.048410000  | 0.889985000  |
| C  | -1.845435000 | 2.325670000  | 0.993508000  |
| N  | -1.730502000 | 1.122055000  | 0.386078000  |
| C  | -2.748437000 | 0.600070000  | -0.329931000 |
| C  | -3.969415000 | 1.273281000  | -0.455033000 |
| C  | -7.408810000 | 0.577655000  | -0.657902000 |
| N  | -6.358587000 | 1.357889000  | -1.134305000 |
| C  | -5.106863000 | 0.616420000  | -1.240195000 |
| C  | -5.480828000 | -0.733608000 | -0.533801000 |
| N  | -6.815152000 | -0.641242000 | -0.238027000 |
| C  | -4.703850000 | 0.338837000  | -2.703445000 |
| O  | -8.582693000 | 0.859774000  | -0.599297000 |
| O  | -4.716112000 | -1.652754000 | -0.311266000 |
| H  | -5.046316000 | 3.053791000  | 0.113544000  |
| H  | -3.100242000 | 4.017072000  | 1.384000000  |
| H  | -0.989564000 | 2.677592000  | 1.565752000  |
| H  | -2.584843000 | -0.375308000 | -0.781878000 |
| H  | -6.601831000 | 2.085083000  | -1.803730000 |
| H  | -7.359622000 | -1.382654000 | 0.198067000  |
| H  | -4.468575000 | 1.281718000  | -3.218294000 |
| H  | -3.821470000 | -0.312380000 | -2.751512000 |
| H  | -5.527460000 | -0.159148000 | -3.233310000 |
| Cl | -0.145840000 | 0.195914000  | 2.872457000  |

Cl 0.171817000 -0.093089000 -1.736149000

*form(II)-Cis(I)-2*

|    |              |              |              |
|----|--------------|--------------|--------------|
| Au | -3.268099000 | 0.040258000  | 2.586139000  |
| C  | -0.512539000 | -3.022423000 | 3.861764000  |
| C  | -1.644015000 | -2.304697000 | 3.499161000  |
| C  | -1.976492000 | 3.825677000  | -1.447520000 |
| C  | -0.317082000 | -0.516784000 | 2.748546000  |
| C  | 0.862808000  | -1.174969000 | 3.120597000  |
| C  | 4.012607000  | -0.452254000 | 4.496774000  |
| C  | 0.041910000  | 2.294221000  | -1.649702000 |
| C  | 2.209366000  | -0.468719000 | 2.950552000  |
| C  | 2.190520000  | 0.840083000  | 3.817546000  |
| C  | -1.473646000 | 2.478690000  | -2.007973000 |
| C  | 2.491350000  | -0.106379000 | 1.478500000  |
| C  | -0.132083000 | 2.535005000  | -3.965862000 |
| C  | -2.230100000 | 1.281625000  | -1.432258000 |
| C  | -2.366735000 | 1.155780000  | -0.044510000 |
| C  | -3.480402000 | -0.898233000 | -0.256513000 |
| C  | -3.387139000 | -0.832708000 | -1.640639000 |
| C  | -2.751841000 | 0.260172000  | -2.233700000 |
| C  | 0.747987000  | -2.448171000 | 3.688772000  |
| Cl | -5.157009000 | 1.272685000  | 2.226091000  |
| Cl | -3.669222000 | -0.011600000 | 4.829793000  |
| H  | 3.462595000  | 0.401732000  | 1.400076000  |
| H  | 2.519593000  | -1.018606000 | 0.864023000  |
| H  | -0.290423000 | 0.489135000  | 2.331422000  |
| H  | -2.651963000 | -2.681960000 | 3.663351000  |
| H  | -0.627203000 | -4.012832000 | 4.302312000  |
| H  | 3.844616000  | -1.893302000 | 3.038194000  |
| H  | 1.723120000  | 0.567527000  | 1.076477000  |
| H  | 1.645925000  | -2.974455000 | 4.015503000  |
| H  | -1.400742000 | 4.651095000  | -1.887847000 |
| H  | -1.857749000 | 3.875961000  | -0.357607000 |
| H  | -3.039725000 | 3.965567000  | -1.690014000 |
| H  | 1.728806000  | 2.311837000  | -2.930368000 |
| H  | -2.156363000 | 2.912109000  | -4.022463000 |
| H  | 3.526610000  | 1.451718000  | 5.343041000  |
| H  | -1.993079000 | 1.916188000  | 0.638243000  |
| H  | -3.976708000 | -1.721887000 | 0.255072000  |
| H  | -3.812806000 | -1.634423000 | -2.244134000 |
| H  | -2.654154000 | 0.324952000  | -3.318322000 |
| N  | -1.428142000 | 2.467790000  | -3.466657000 |
| N  | -2.965498000 | 0.084909000  | 0.513963000  |
| N  | -1.529510000 | -1.074664000 | 2.947796000  |
| N  | 3.305683000  | -1.209705000 | 3.565800000  |

|   |             |              |              |
|---|-------------|--------------|--------------|
| N | 3.258095000 | 0.736673000  | 4.669912000  |
| N | 0.716185000 | 2.357659000  | -2.836715000 |
| O | 1.378674000 | 1.740026000  | 3.723009000  |
| O | 0.227721000 | 2.695042000  | -5.107773000 |
| O | 0.487479000 | 2.122149000  | -0.528550000 |
| O | 5.047964000 | -0.731740000 | 5.054400000  |

*form(II)-Cis(II)-2*

|    |              |              |              |
|----|--------------|--------------|--------------|
| Au | -1.241425000 | 1.627299000  | 2.509316000  |
| C  | 2.799285000  | 0.123723000  | 2.831067000  |
| C  | 1.680582000  | 0.916199000  | 2.608299000  |
| C  | -0.745120000 | 5.389963000  | -1.763884000 |
| C  | 0.260614000  | -0.863608000 | 3.184240000  |
| C  | 1.344327000  | -1.722524000 | 3.403405000  |
| C  | 2.300834000  | -5.093116000 | 3.077943000  |
| C  | 1.575236000  | 4.351123000  | -1.669443000 |
| C  | 1.075868000  | -3.180970000 | 3.770405000  |
| C  | 0.391841000  | -3.863137000 | 2.532881000  |
| C  | 0.098067000  | 4.161853000  | -2.166285000 |
| C  | 0.163319000  | -3.317704000 | 5.007211000  |
| C  | 1.583173000  | 4.389044000  | -4.004544000 |
| C  | -0.431994000 | 2.866120000  | -1.554766000 |
| C  | -0.599771000 | 2.785309000  | -0.167137000 |
| C  | -1.265766000 | 0.536794000  | -0.294941000 |
| C  | -1.141461000 | 0.556462000  | -1.678165000 |
| C  | -0.710494000 | 1.723730000  | -2.312622000 |
| C  | 2.631875000  | -1.207440000 | 3.219353000  |
| Cl | -3.055162000 | 2.982747000  | 2.225808000  |
| Cl | -1.545973000 | 1.588954000  | 4.770508000  |
| H  | -0.022994000 | -4.379318000 | 5.219339000  |
| H  | 0.641589000  | -2.858802000 | 5.884575000  |
| H  | -0.767323000 | -1.193705000 | 3.316443000  |
| H  | 1.757781000  | 1.957391000  | 2.296324000  |
| H  | 3.792233000  | 0.551884000  | 2.693784000  |
| H  | 2.788121000  | -4.047560000 | 4.782573000  |
| H  | -0.805384000 | -2.828208000 | 4.844465000  |
| H  | 3.498084000  | -1.853052000 | 3.372079000  |
| H  | -0.314906000 | 6.299855000  | -2.204055000 |
| H  | -0.769169000 | 5.517813000  | -0.674135000 |
| H  | -1.778003000 | 5.275650000  | -2.123305000 |
| H  | 3.336192000  | 4.658793000  | -2.805591000 |
| H  | -0.457827000 | 4.309162000  | -4.258318000 |
| H  | 0.960485000  | -5.618969000 | 1.493567000  |
| H  | -0.409910000 | 3.636432000  | 0.482969000  |
| H  | -1.589907000 | -0.350838000 | 0.247653000  |
| H  | -1.377178000 | -0.342474000 | -2.247784000 |

|   |              |              |              |
|---|--------------|--------------|--------------|
| H | -0.580338000 | 1.749860000  | -3.395597000 |
| N | 0.288461000  | 4.066306000  | -3.609650000 |
| N | -0.988694000 | 1.641952000  | 0.432423000  |
| N | 0.438905000  | 0.410731000  | 2.781427000  |
| N | 2.300188000  | -3.965061000 | 3.892735000  |
| N | 1.168177000  | -4.948648000 | 2.231073000  |
| N | 2.333553000  | 4.482516000  | -2.800733000 |
| O | -0.617819000 | -3.472162000 | 1.976197000  |
| O | 2.007994000  | 4.549524000  | -5.124259000 |
| O | 1.935907000  | 4.363789000  | -0.506712000 |
| O | 3.089765000  | -6.008204000 | 3.064186000  |

*form(II)-Cis(III)-2*

|    |              |              |              |
|----|--------------|--------------|--------------|
| Au | -3.125260000 | 1.739127000  | 3.214987000  |
| C  | -0.655439000 | -1.625781000 | 4.324360000  |
| C  | -1.725811000 | -0.784210000 | 4.050814000  |
| C  | -2.029029000 | -1.362336000 | -1.692220000 |
| C  | -0.287038000 | 0.773995000  | 3.041493000  |
| C  | 0.837982000  | -0.015230000 | 3.310849000  |
| C  | 4.177840000  | 0.491740000  | 4.267608000  |
| C  | -4.536264000 | -1.083711000 | -1.418316000 |
| C  | 2.229971000  | 0.483720000  | 2.907880000  |
| C  | 2.465105000  | 1.899807000  | 3.539311000  |
| C  | -3.207465000 | -0.382518000 | -1.868583000 |
| C  | 2.371734000  | 0.578961000  | 1.374617000  |
| C  | -4.688227000 | -0.651080000 | -3.706638000 |
| C  | -3.010068000 | 0.887612000  | -1.034241000 |
| C  | -2.999556000 | 0.805127000  | 0.363769000  |
| C  | -2.730354000 | 3.128370000  | 0.582241000  |
| C  | -2.706066000 | 3.275945000  | -0.798443000 |
| C  | -2.867614000 | 2.153839000  | -1.613013000 |
| C  | 0.636783000  | -1.231847000 | 3.972567000  |
| Cl | -4.842809000 | 3.232685000  | 3.054433000  |
| Cl | -3.468225000 | 1.564240000  | 5.464064000  |
| H  | 3.372438000  | 0.946597000  | 1.108562000  |
| H  | 2.222985000  | -0.409323000 | 0.915273000  |
| H  | -0.185722000 | 1.749871000  | 2.568175000  |
| H  | -2.745621000 | -1.018180000 | 4.350954000  |
| H  | -0.838414000 | -2.570797000 | 4.835910000  |
| H  | 3.694441000  | -1.114154000 | 3.073451000  |
| H  | 1.629983000  | 1.275418000  | 0.961404000  |
| H  | 1.493195000  | -1.856110000 | 4.231069000  |
| H  | -2.196203000 | -2.267953000 | -2.291622000 |
| H  | -1.930540000 | -1.661723000 | -0.640236000 |
| H  | -1.088958000 | -0.891511000 | -2.015394000 |
| H  | -6.235203000 | -1.599407000 | -2.571393000 |

|   |              |              |              |
|---|--------------|--------------|--------------|
| H | -2.749926000 | -0.005112000 | -3.959813000 |
| H | 4.009820000  | 2.549265000  | 4.832978000  |
| H | -3.150049000 | -0.147572000 | 0.870002000  |
| H | -2.662261000 | 3.975451000  | 1.262458000  |
| H | -2.588870000 | 4.271999000  | -1.225473000 |
| H | -2.906803000 | 2.260836000  | -2.697899000 |
| N | -3.491605000 | -0.089135000 | -3.268081000 |
| N | -2.876274000 | 1.903695000  | 1.138395000  |
| N | -1.526509000 | 0.395381000  | 3.418837000  |
| N | 3.298459000  | -0.292704000 | 3.525147000  |
| N | 3.586385000  | 1.781848000  | 4.314688000  |
| N | -5.315782000 | -1.162893000 | -2.540211000 |
| O | 1.773036000  | 2.882981000  | 3.349367000  |
| O | -5.120266000 | -0.701936000 | -4.833571000 |
| O | -4.784685000 | -1.471225000 | -0.291615000 |
| O | 5.224699000  | 0.164669000  | 4.773879000  |

### L3

|   |             |              |              |
|---|-------------|--------------|--------------|
| N | 1.441878000 | 1.137180000  | -0.406724000 |
| C | 2.619342000 | 0.481650000  | -0.526081000 |
| C | 3.865326000 | 1.098570000  | -0.656071000 |
| C | 3.933670000 | 2.495995000  | -0.655344000 |
| C | 2.729473000 | 3.204162000  | -0.538925000 |
| C | 1.537044000 | 2.488395000  | -0.424066000 |
| C | 5.271245000 | 3.222728000  | -0.765920000 |
| C | 5.309616000 | 4.110731000  | -2.045444000 |
| N | 6.334127000 | 3.606230000  | -2.831262000 |
| C | 7.159995000 | 2.700800000  | -2.110616000 |
| N | 6.392665000 | 2.274996000  | -1.010741000 |
| C | 5.546195000 | 4.125904000  | 0.449262000  |
| O | 4.596050000 | 5.063807000  | -2.294577000 |
| O | 8.286321000 | 2.356329000  | -2.412820000 |
| H | 2.547738000 | -0.611439000 | -0.517040000 |
| H | 4.769526000 | 0.500212000  | -0.766994000 |
| H | 2.712915000 | 4.294504000  | -0.564229000 |
| H | 0.584548000 | 3.022460000  | -0.340182000 |
| H | 6.742613000 | 4.158580000  | -3.603265000 |
| H | 6.997064000 | 2.069650000  | -0.193894000 |
| H | 5.565239000 | 3.527595000  | 1.372132000  |
| H | 6.512826000 | 4.637944000  | 0.328645000  |
| H | 4.760625000 | 4.886445000  | 0.543178000  |

### Trans(I)-3

|   |             |              |              |
|---|-------------|--------------|--------------|
| N | 2.053669000 | -0.234346000 | -0.310298000 |
| C | 2.778062000 | 0.794980000  | -0.804257000 |
| C | 4.165939000 | 0.767223000  | -0.787113000 |



|    |              |              |              |
|----|--------------|--------------|--------------|
| C  | 4.841897000  | -0.335845000 | -0.250552000 |
| C  | 4.064157000  | -1.386659000 | 0.264686000  |
| C  | 2.680369000  | -1.311329000 | 0.219477000  |
| C  | 6.363511000  | -0.392018000 | -0.186715000 |
| C  | 6.789671000  | -0.394645000 | 1.329178000  |
| N  | 7.613648000  | 0.690540000  | 1.480263000  |
| C  | 7.838289000  | 1.411402000  | 0.279408000  |
| N  | 6.995002000  | 0.833032000  | -0.665453000 |
| C  | 6.919910000  | -1.658402000 | -0.871730000 |
| O  | 6.444876000  | -1.208808000 | 2.160806000  |
| O  | 8.602323000  | 2.336658000  | 0.131722000  |
| H  | 2.223975000  | 1.647240000  | -1.192902000 |
| H  | 4.718562000  | 1.621960000  | -1.176459000 |
| H  | 4.525320000  | -2.257177000 | 0.728832000  |
| H  | 2.048927000  | -2.113705000 | 0.595918000  |
| H  | 8.085009000  | 0.933123000  | 2.349404000  |
| H  | 7.263568000  | 0.944069000  | -1.640933000 |
| H  | 6.641103000  | -1.671684000 | -1.935407000 |
| H  | 8.015350000  | -1.674608000 | -0.791462000 |
| H  | 6.528208000  | -2.565622000 | -0.394579000 |
| N  | -2.054056000 | -0.091033000 | -0.374023000 |
| C  | -2.771133000 | -1.118086000 | 0.135241000  |
| C  | -4.159009000 | -1.087231000 | 0.144973000  |
| C  | -4.842703000 | 0.003955000  | -0.405751000 |
| C  | -4.072650000 | 1.053254000  | -0.935612000 |
| C  | -2.688283000 | 0.986201000  | -0.894200000 |
| C  | -6.364906000 | 0.080002000  | -0.409122000 |
| C  | -6.798999000 | 1.296344000  | 0.491197000  |
| N  | -7.614821000 | 0.765122000  | 1.456666000  |
| C  | -7.830769000 | -0.630183000 | 1.320210000  |
| N  | -6.987682000 | -1.038693000 | 0.290273000  |
| C  | -6.922614000 | 0.280924000  | -1.834586000 |
| O  | -6.465619000 | 2.452183000  | 0.329781000  |
| O  | -8.588366000 | -1.305362000 | 1.977412000  |
| H  | -2.211388000 | -1.966323000 | 0.524603000  |
| H  | -4.705163000 | -1.917926000 | 0.591273000  |
| H  | -4.541321000 | 1.946224000  | -1.346670000 |
| H  | -2.062250000 | 1.798199000  | -1.259006000 |
| H  | -8.089325000 | 1.315514000  | 2.169645000  |
| H  | -7.252345000 | -1.889620000 | -0.201587000 |
| H  | -6.637888000 | -0.563007000 | -2.479581000 |
| H  | -8.018560000 | 0.348051000  | -1.800552000 |
| H  | -6.536123000 | 1.207633000  | -2.277407000 |
| Au | -0.000009000 | -0.161921000 | -0.347473000 |
| Cl | 0.057451000  | 1.939352000  | 0.618796000  |
| Cl | -0.057906000 | -2.262215000 | -1.319173000 |

*Trans(II)-3*

|    |              |              |              |
|----|--------------|--------------|--------------|
| N  | 2.042396000  | -0.027482000 | 0.204266000  |
| C  | 2.715092000  | -1.091332000 | -0.289250000 |
| C  | 4.096519000  | -1.178053000 | -0.181162000 |
| C  | 4.815422000  | -0.172383000 | 0.476815000  |
| C  | 4.090054000  | 0.918160000  | 0.986409000  |
| C  | 2.714061000  | 0.971618000  | 0.823613000  |
| C  | 6.331623000  | -0.231358000 | 0.622115000  |
| C  | 6.952713000  | 0.994490000  | -0.145768000 |
| N  | 7.816311000  | 0.453328000  | -1.062778000 |
| C  | 7.899203000  | -0.961429000 | -1.006797000 |
| N  | 6.924682000  | -1.356091000 | -0.093997000 |
| C  | 6.760569000  | -0.171335000 | 2.103867000  |
| O  | 6.701967000  | 2.163683000  | 0.063082000  |
| O  | 8.660205000  | -1.659713000 | -1.635299000 |
| Au | -0.001618000 | 0.073859000  | 0.016909000  |
| Cl | 0.192544000  | 2.187343000  | -0.903566000 |
| Cl | -0.187169000 | -2.043164000 | 0.933497000  |
| H  | 2.124897000  | -1.873818000 | -0.762349000 |
| H  | 4.609975000  | -2.033845000 | -0.618789000 |
| H  | 4.592444000  | 1.750790000  | 1.476902000  |
| H  | 2.126784000  | 1.819501000  | 1.170813000  |
| H  | 8.404942000  | 1.002391000  | -1.686042000 |
| H  | 7.068720000  | -2.255606000 | 0.360227000  |
| H  | 6.348560000  | -1.028541000 | 2.655928000  |
| H  | 7.856394000  | -0.195129000 | 2.176751000  |
| H  | 6.404777000  | 0.753698000  | 2.574884000  |
| N  | -2.047142000 | 0.177465000  | -0.164347000 |
| C  | -2.728892000 | -0.838855000 | -0.739456000 |
| C  | -4.110290000 | -0.791965000 | -0.869937000 |
| C  | -4.824747000 | 0.317386000  | -0.400694000 |
| C  | -4.091839000 | 1.355353000  | 0.199414000  |
| C  | -2.712199000 | 1.261243000  | 0.300969000  |
| C  | -6.343591000 | 0.396958000  | -0.497872000 |
| C  | -6.928339000 | 0.410956000  | 0.963978000  |
| N  | -7.781199000 | -0.660552000 | 1.027822000  |
| C  | -7.888402000 | -1.381297000 | -0.189308000 |
| N  | -6.940533000 | -0.818838000 | -1.039814000 |
| C  | -6.803402000 | 1.670119000  | -1.239951000 |
| O  | -6.661109000 | 1.221866000  | 1.826821000  |
| O  | -8.647037000 | -2.294924000 | -0.416137000 |
| H  | -2.148325000 | -1.696620000 | -1.073433000 |
| H  | -4.628621000 | -1.636952000 | -1.322696000 |
| H  | -4.588403000 | 2.230365000  | 0.616150000  |
| H  | -2.113972000 | 2.053729000  | 0.746111000  |

|   |              |              |              |
|---|--------------|--------------|--------------|
| H | -8.347464000 | -0.892194000 | 1.841507000  |
| H | -7.106157000 | -0.927593000 | -2.038194000 |
| H | -6.416817000 | 1.673243000  | -2.269474000 |
| H | -7.900820000 | 1.706674000  | -1.272778000 |
| H | -6.445613000 | 2.572243000  | -0.727909000 |

*Cis(I)-3*

|   |              |              |              |
|---|--------------|--------------|--------------|
| N | 1.977991000  | 2.124129000  | 0.529276000  |
| C | 2.059004000  | 3.266494000  | -0.189616000 |
| C | 2.070321000  | 3.246006000  | -1.578923000 |
| C | 2.003657000  | 2.027436000  | -2.265937000 |
| C | 1.927646000  | 0.851989000  | -1.497429000 |
| C | 1.921569000  | 0.933901000  | -0.112783000 |
| C | 2.056584000  | 1.959689000  | -3.788253000 |
| C | 3.369824000  | 1.192517000  | -4.198419000 |
| N | 4.066858000  | 2.059948000  | -4.997922000 |
| C | 3.399968000  | 3.291321000  | -5.225826000 |
| N | 2.274769000  | 3.263235000  | -4.404793000 |
| C | 0.834579000  | 1.218989000  | -4.371542000 |
| O | 3.664383000  | 0.064235000  | -3.860876000 |
| O | 3.754399000  | 4.170080000  | -5.975792000 |
| H | 2.143665000  | 4.195178000  | 0.372676000  |
| H | 2.160242000  | 4.185108000  | -2.124613000 |
| H | 1.917611000  | -0.129921000 | -1.968667000 |
| H | 1.885200000  | 0.038513000  | 0.506874000  |
| H | 4.948660000  | 1.833608000  | -5.453908000 |
| H | 1.494984000  | 3.853098000  | -4.687761000 |
| H | -0.094272000 | 1.744603000  | -4.105821000 |
| H | 0.914153000  | 1.173052000  | -5.466201000 |
| H | 0.780448000  | 0.191797000  | -3.989100000 |
| N | 0.333168000  | 1.041914000  | 2.827221000  |
| C | -0.845996000 | 1.498006000  | 2.350098000  |
| C | -2.027679000 | 0.794613000  | 2.543775000  |
| C | -2.016136000 | -0.412024000 | 3.256166000  |
| C | -0.778005000 | -0.869188000 | 3.738406000  |
| C | 0.370326000  | -0.122156000 | 3.517519000  |
| C | -3.286734000 | -1.222569000 | 3.481270000  |
| C | -3.145463000 | -2.581828000 | 2.699798000  |
| N | -4.222893000 | -2.631388000 | 1.852893000  |
| C | -5.089579000 | -1.513431000 | 1.961577000  |
| N | -4.454681000 | -0.633003000 | 2.833751000  |
| C | -3.521404000 | -1.519726000 | 4.978018000  |
| O | -2.255172000 | -3.394183000 | 2.843796000  |
| O | -6.148285000 | -1.370956000 | 1.395397000  |
| H | -0.829166000 | 2.446136000  | 1.813277000  |
| H | -2.957937000 | 1.187166000  | 2.133516000  |

|    |              |              |             |
|----|--------------|--------------|-------------|
| H  | -0.692929000 | -1.813860000 | 4.273539000 |
| H  | 1.339969000  | -0.434719000 | 3.902517000 |
| H  | -4.438225000 | -3.421651000 | 1.248241000 |
| H  | -5.054621000 | 0.025040000  | 3.327355000 |
| H  | -3.631279000 | -0.581748000 | 5.541288000 |
| H  | -4.435583000 | -2.116460000 | 5.099965000 |
| H  | -2.683483000 | -2.087398000 | 5.401668000 |
| Au | 2.073093000  | 2.187940000  | 2.623022000 |
| Cl | 2.220405000  | 2.237074000  | 4.899644000 |
| Cl | 3.953099000  | 3.468043000  | 2.450254000 |

*Cis(II)-3*

|    |              |              |              |
|----|--------------|--------------|--------------|
| N  | 2.201225000  | 2.274114000  | 0.452712000  |
| C  | 2.439313000  | 3.384984000  | -0.280771000 |
| C  | 2.440692000  | 3.347655000  | -1.669913000 |
| C  | 2.198466000  | 2.142975000  | -2.341358000 |
| C  | 1.962199000  | 0.999044000  | -1.557812000 |
| C  | 1.975352000  | 1.096050000  | -0.174330000 |
| C  | 2.224849000  | 2.044015000  | -3.862160000 |
| C  | 3.398810000  | 1.076912000  | -4.272802000 |
| N  | 4.208648000  | 1.812701000  | -5.096971000 |
| C  | 3.736107000  | 3.128625000  | -5.339445000 |
| N  | 2.632653000  | 3.287771000  | -4.504276000 |
| C  | 0.896221000  | 1.489063000  | -4.419248000 |
| O  | 3.520970000  | -0.077760000 | -3.917646000 |
| O  | 4.210526000  | 3.929366000  | -6.110012000 |
| Au | 2.324828000  | 2.356087000  | 2.544150000  |
| Cl | 2.515081000  | 2.431005000  | 4.816379000  |
| Cl | 4.380862000  | 3.320991000  | 2.328482000  |
| H  | 2.655503000  | 4.299976000  | 0.268717000  |
| H  | 2.659293000  | 4.260115000  | -2.224662000 |
| H  | 1.813210000  | 0.023617000  | -2.018809000 |
| H  | 1.818317000  | 0.222866000  | 0.458056000  |
| H  | 5.038435000  | 1.445739000  | -5.559122000 |
| H  | 1.950422000  | 3.988646000  | -4.786011000 |
| H  | 0.062993000  | 2.157639000  | -4.157828000 |
| H  | 0.954612000  | 1.407176000  | -5.513123000 |
| H  | 0.688930000  | 0.491174000  | -4.011996000 |
| N  | 0.425209000  | 1.501460000  | 2.783237000  |
| C  | 0.265849000  | 0.427051000  | 3.588818000  |
| C  | -0.990306000 | -0.116475000 | 3.829168000  |
| C  | -2.126517000 | 0.450088000  | 3.238579000  |
| C  | -1.937453000 | 1.572147000  | 2.411788000  |
| C  | -0.659801000 | 2.072676000  | 2.210088000  |
| C  | -3.528568000 | -0.087770000 | 3.499905000  |
| C  | -4.361188000 | 1.037357000  | 4.223041000  |

|   |              |              |             |
|---|--------------|--------------|-------------|
| N | -4.785252000 | 0.480170000  | 5.400408000 |
| C | -4.395912000 | -0.874265000 | 5.566735000 |
| N | -3.550821000 | -1.153030000 | 4.495030000 |
| C | -4.241884000 | -0.478099000 | 2.187503000 |
| O | -4.568294000 | 2.152697000  | 3.790086000 |
| O | -4.734277000 | -1.612009000 | 6.461876000 |
| H | 1.163257000  | 0.027574000  | 4.058887000 |
| H | -1.079214000 | -0.968884000 | 4.502675000 |
| H | -2.784896000 | 2.086293000  | 1.960493000 |
| H | -0.485488000 | 2.953844000  | 1.593500000 |
| H | -5.384283000 | 0.953964000  | 6.073811000 |
| H | -3.468555000 | -2.131647000 | 4.227483000 |
| H | -3.685768000 | -1.274968000 | 1.672393000 |
| H | -5.256184000 | -0.838713000 | 2.406207000 |
| H | -4.323380000 | 0.386089000  | 1.515833000 |

*Cis(III)-3*

|   |              |              |              |
|---|--------------|--------------|--------------|
| N | 2.132094000  | 1.862897000  | 0.492429000  |
| C | 2.034147000  | 0.684866000  | -0.162574000 |
| C | 1.943634000  | 0.630036000  | -1.547259000 |
| C | 1.960714000  | 1.813737000  | -2.297282000 |
| C | 2.064947000  | 3.026568000  | -1.594838000 |
| C | 2.155647000  | 3.019684000  | -0.210091000 |
| C | 1.835734000  | 1.805899000  | -3.816249000 |
| C | 0.470137000  | 2.492782000  | -4.194698000 |
| N | -0.213443000 | 1.564525000  | -4.936878000 |
| C | 0.497748000  | 0.353294000  | -5.136726000 |
| N | 1.649636000  | 0.465446000  | -4.362471000 |
| C | 2.993326000  | 2.570059000  | -4.493947000 |
| O | 0.128182000  | 3.613853000  | -3.878792000 |
| O | 0.150596000  | -0.574114000 | -5.830239000 |
| H | 2.032695000  | -0.220396000 | 0.443900000  |
| H | 1.851918000  | -0.337452000 | -2.040472000 |
| H | 2.056899000  | 3.982921000  | -2.115303000 |
| H | 2.263960000  | 3.939459000  | 0.362837000  |
| H | -1.117926000 | 1.734707000  | -5.372175000 |
| H | 2.444454000  | -0.102271000 | -4.649612000 |
| H | 3.956907000  | 2.100304000  | -4.248970000 |
| H | 2.859567000  | 2.557729000  | -5.584190000 |
| H | 3.019072000  | 3.616423000  | -4.164879000 |
| N | 0.551843000  | 0.854703000  | 2.855355000  |
| C | -0.609575000 | 1.354761000  | 2.378460000  |
| C | -1.820185000 | 0.709470000  | 2.594274000  |
| C | -1.856200000 | -0.484068000 | 3.327858000  |
| C | -0.636560000 | -0.984176000 | 3.815322000  |
| C | 0.542420000  | -0.294110000 | 3.571162000  |

|    |              |              |             |
|----|--------------|--------------|-------------|
| C  | -3.156181000 | -1.242948000 | 3.566804000 |
| C  | -3.064860000 | -2.615874000 | 2.800889000 |
| N  | -4.145718000 | -2.637451000 | 1.957651000 |
| C  | -4.971565000 | -1.487891000 | 2.054091000 |
| N  | -4.303698000 | -0.620420000 | 2.914522000 |
| C  | -3.398213000 | -1.513802000 | 5.067233000 |
| O  | -2.202866000 | -3.457021000 | 2.952446000 |
| O  | -6.025832000 | -1.314856000 | 1.488282000 |
| H  | -0.554389000 | 2.288674000  | 1.819823000 |
| H  | -2.735181000 | 1.134982000  | 2.182661000 |
| H  | -0.591383000 | -1.920247000 | 4.369660000 |
| H  | 1.500468000  | -0.639791000 | 3.956670000 |
| H  | -4.389577000 | -3.425824000 | 1.361382000 |
| H  | -4.877887000 | 0.066226000  | 3.399611000 |
| H  | -3.473965000 | -0.566016000 | 5.619625000 |
| H  | -4.332646000 | -2.076325000 | 5.197910000 |
| H  | -2.580290000 | -2.105948000 | 5.496413000 |
| Au | 2.345936000  | 1.899047000  | 2.575833000 |
| Cl | 2.620199000  | 1.920147000  | 4.840669000 |
| Cl | 4.284966000  | 3.069077000  | 2.299515000 |
